# Supplementary material for: Ultrafast igniting, imidazolium based hypergolic ionic liquids with enhanced hydrophobicity
Source: Royal Society of Chemistry journal article supplement (doi:10.1039/c6nj03233h), 2017-01-01
Supplement: c6nj03233h1.pdf [file c6nj03233h1.pdf]

## **Supporting Information**

### **Ultrafast Igniting, Imidazolium based Hypergolic Ionic Liquids with Enhanced Hydrophobicity**

Vikas K. Bhosale and Prashant S. Kulkarni\*

#### **Contents**

**SI- A.** <sup>1</sup>H & <sup>13</sup>C NMR spectrum of molecules (**1-17**)

**SI- B.** DSC & DTA spectrum of ionic liquids (**8-17**)

**SI- C.** XRD graph of combustion products of ionic liquid **8**

**SI- D.** Hydrophobic image of ionic liquid **10**

SI- A. <sup>1</sup>H & <sup>13</sup>C NMR spectrum of molecules (1-17)

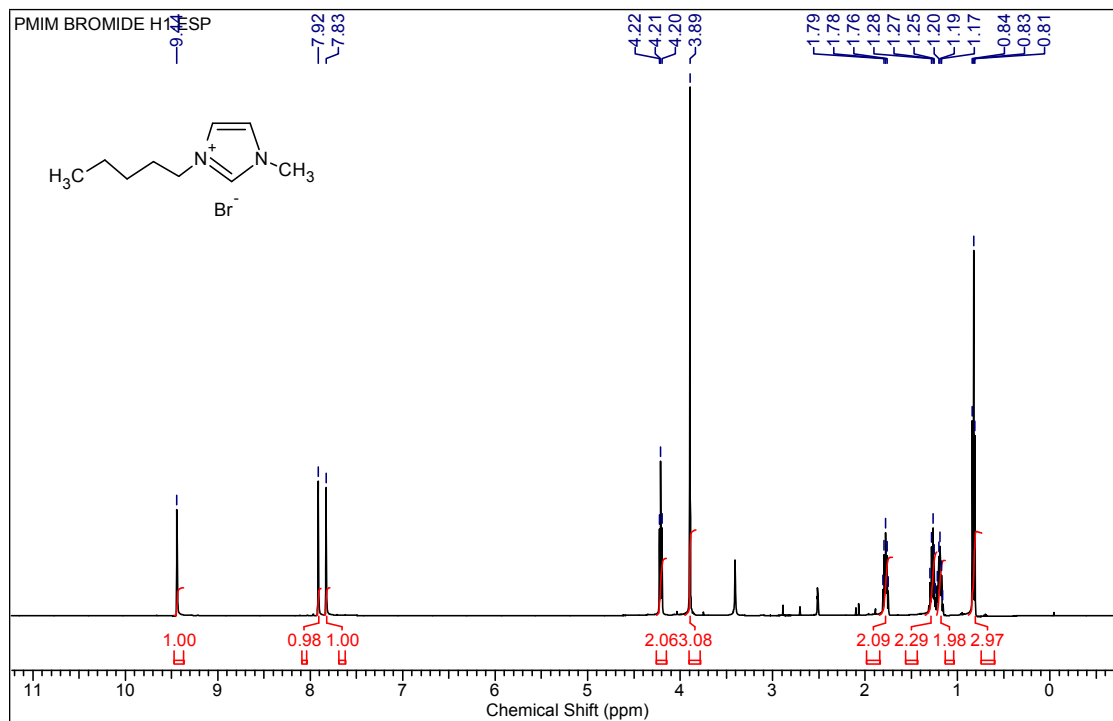

Figure SI-A1. <sup>1</sup>H-NMR spectra of compound 1

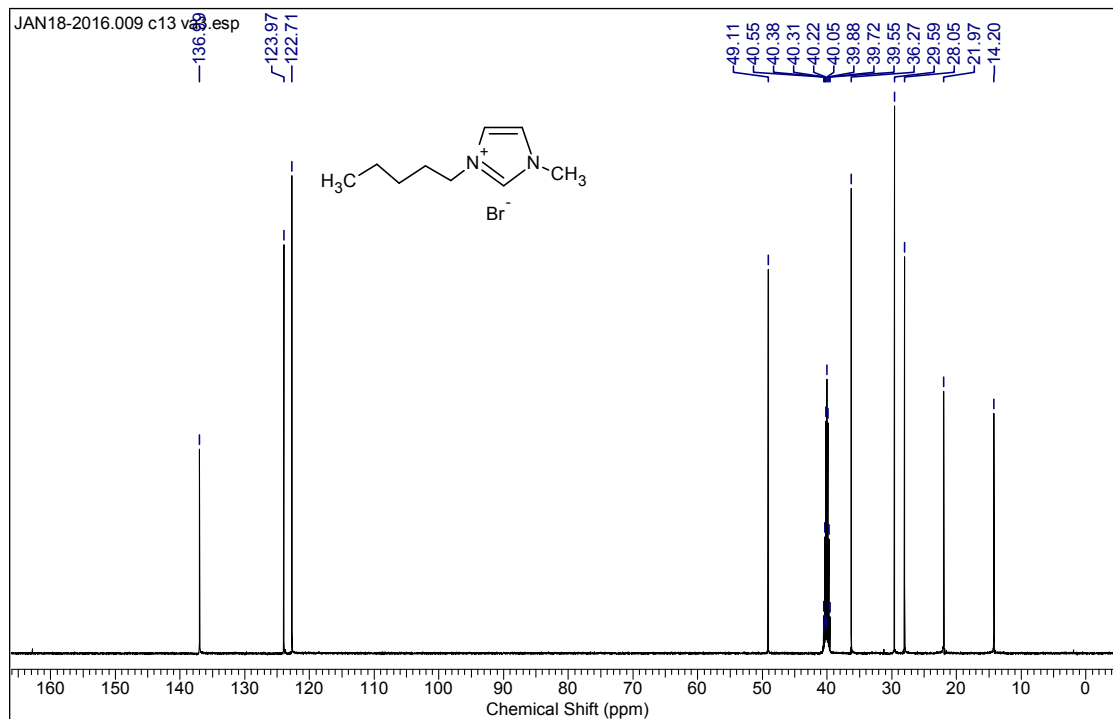

Figure SI-A2. <sup>13</sup>C-NMR spectra of compound 1

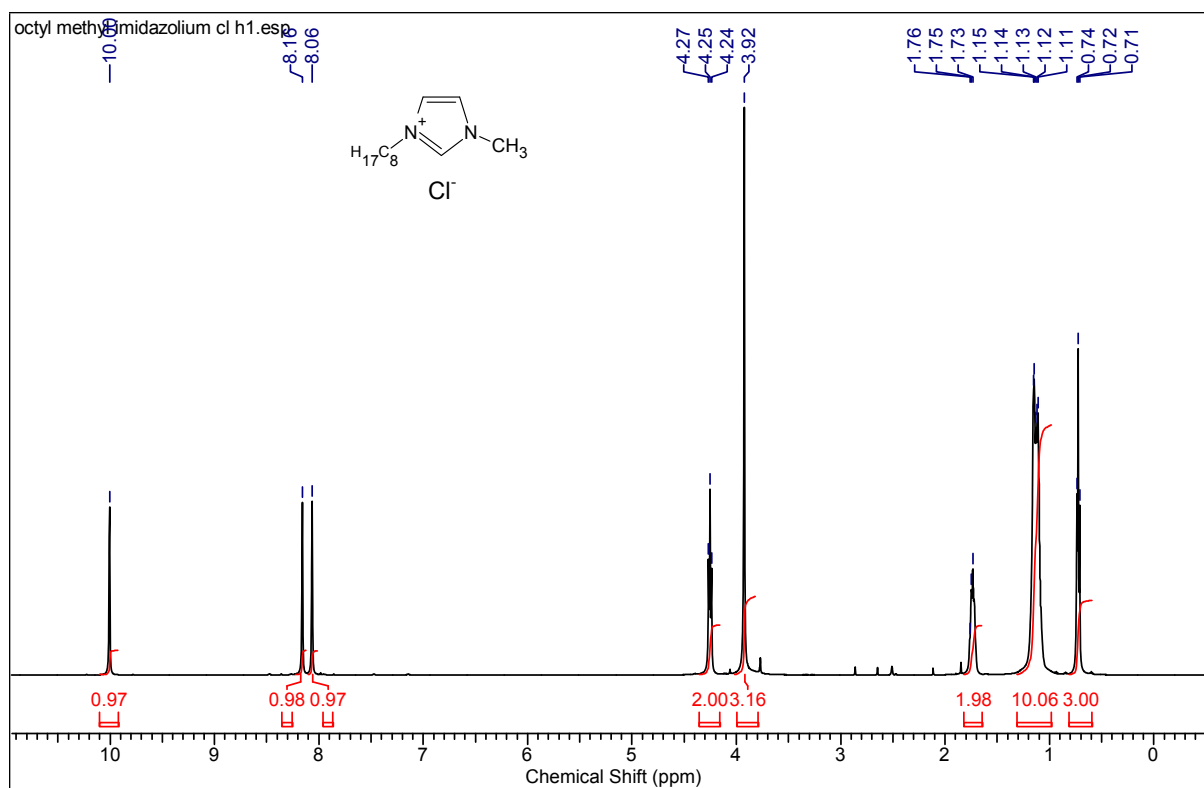

Figure SI-A3.  $^1\text{H}$ -NMR spectra of compound 2

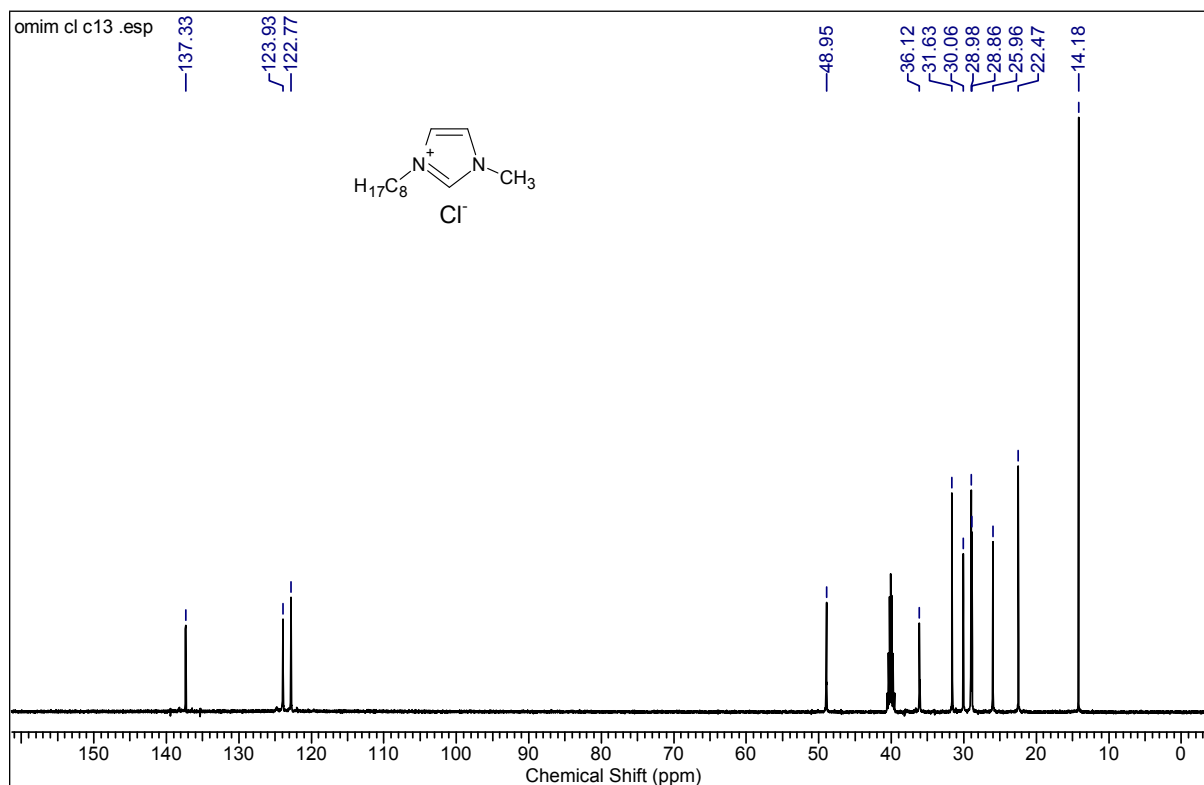

Figure SI-A4.  $^{13}\text{C}$ -NMR spectra of compound 2

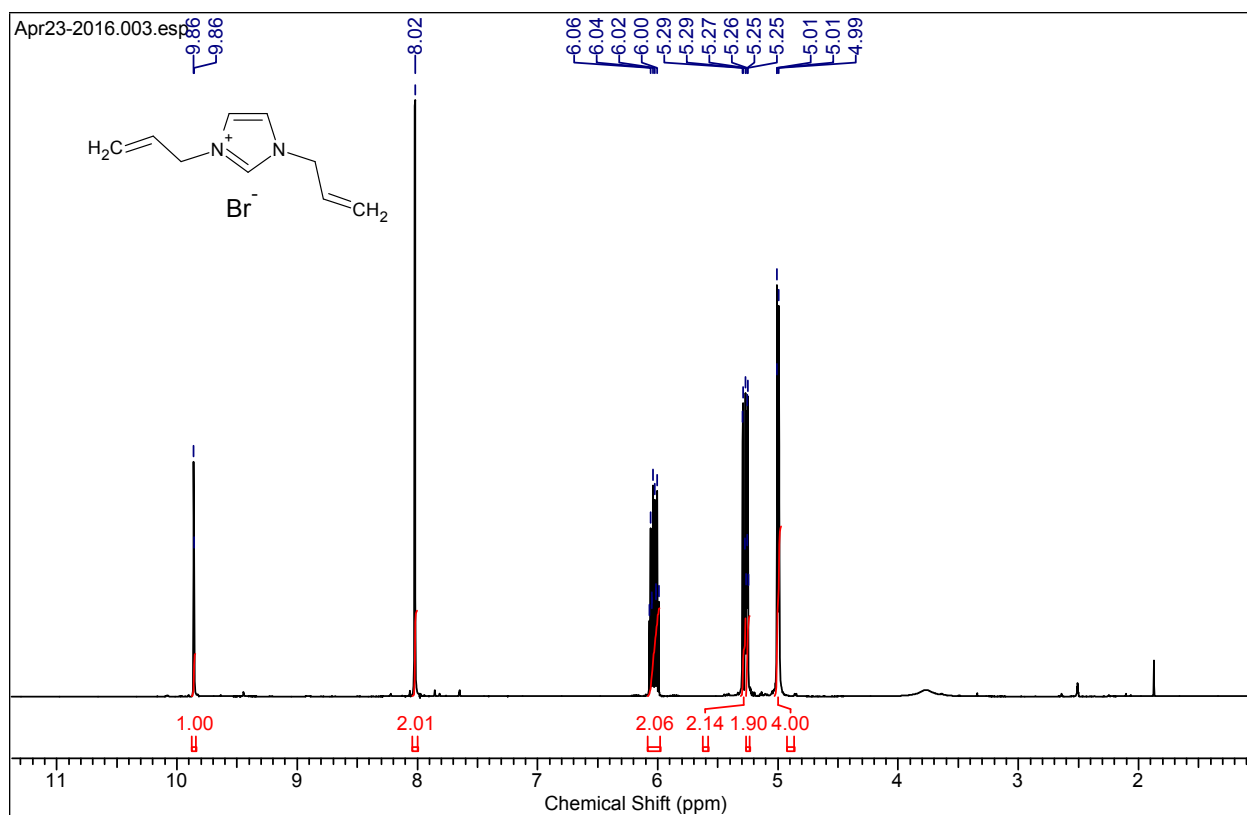

**Figure SI-A5.**  $^1\text{H}$ -NMR spectra of compound **3**

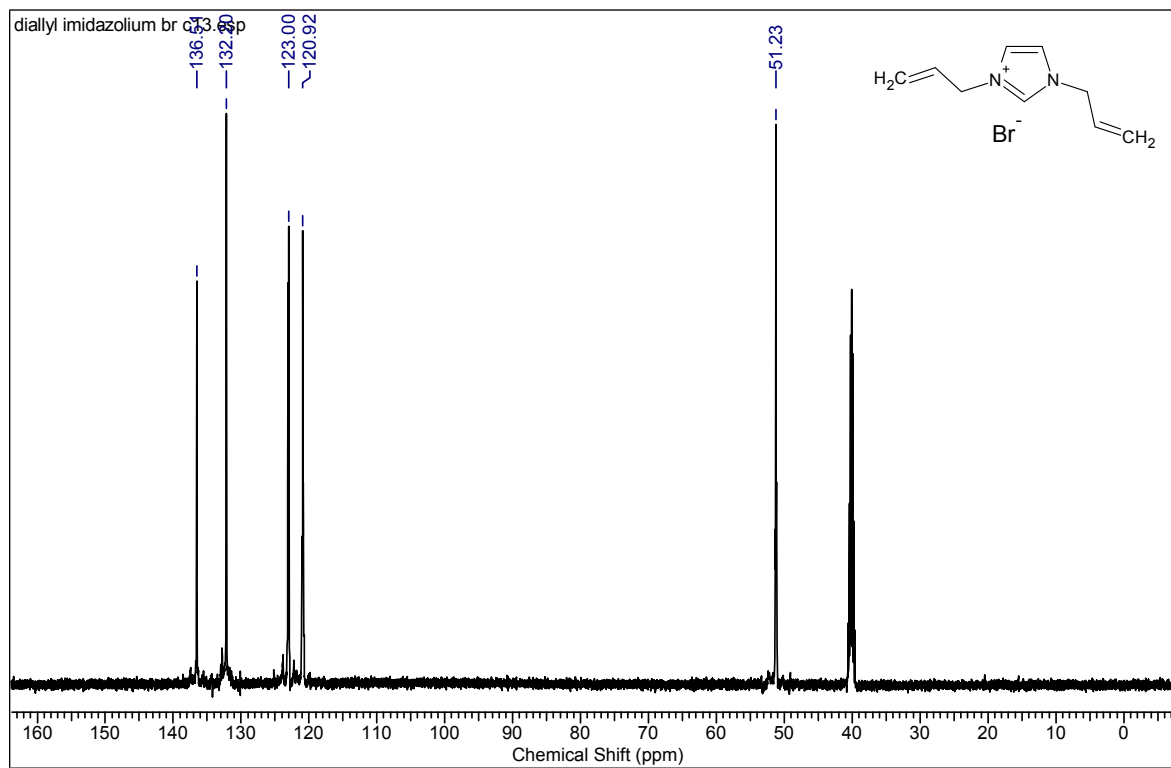

**Figure SI-A6.**  $^{13}\text{C}$ -NMR spectra of compound **3**

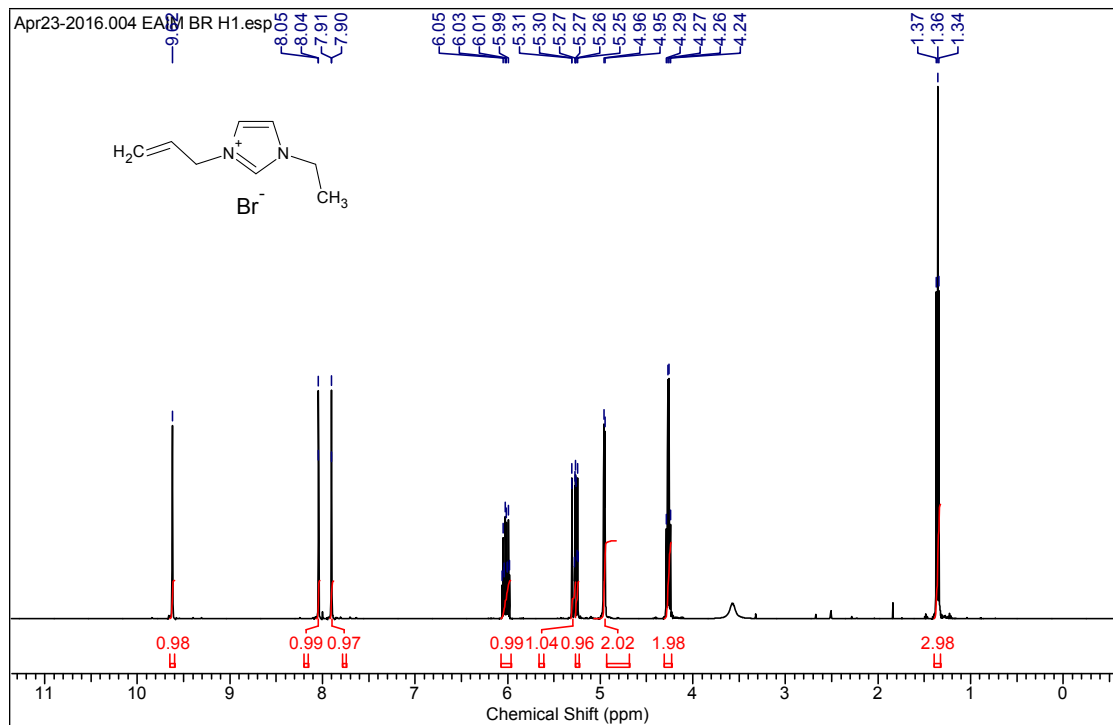

Figure SI-A7.  $^1\text{H-NMR}$  spectra of compound 4

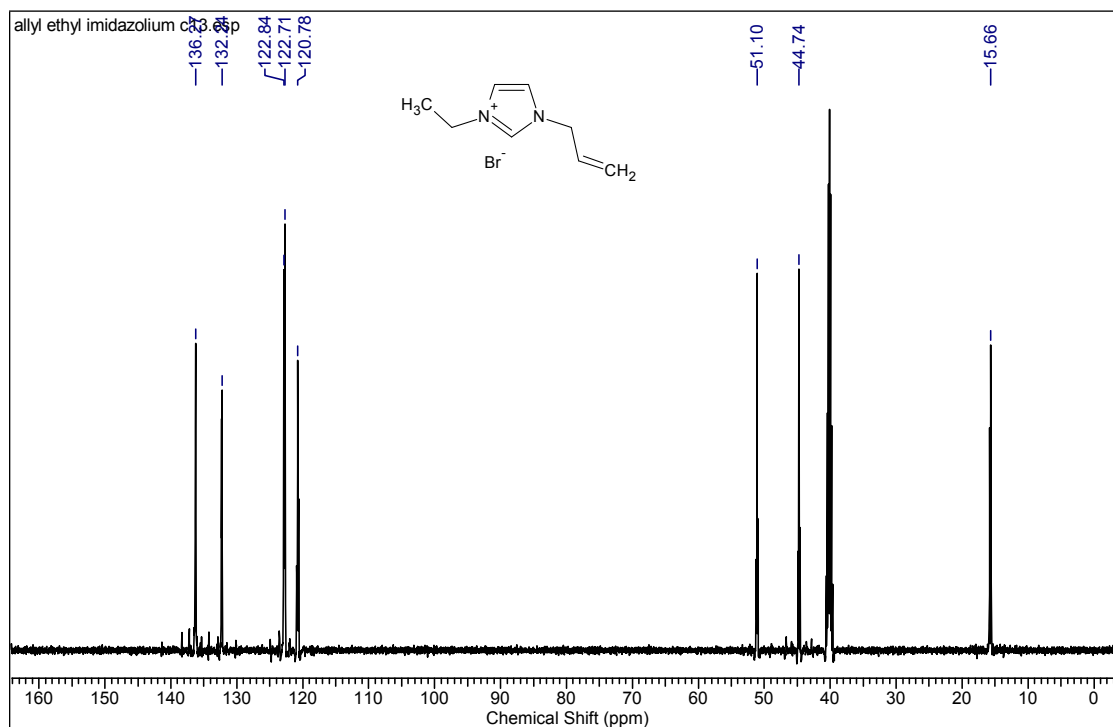

Figure SI-A8.  $^{13}\text{C-NMR}$  spectra of compound 4

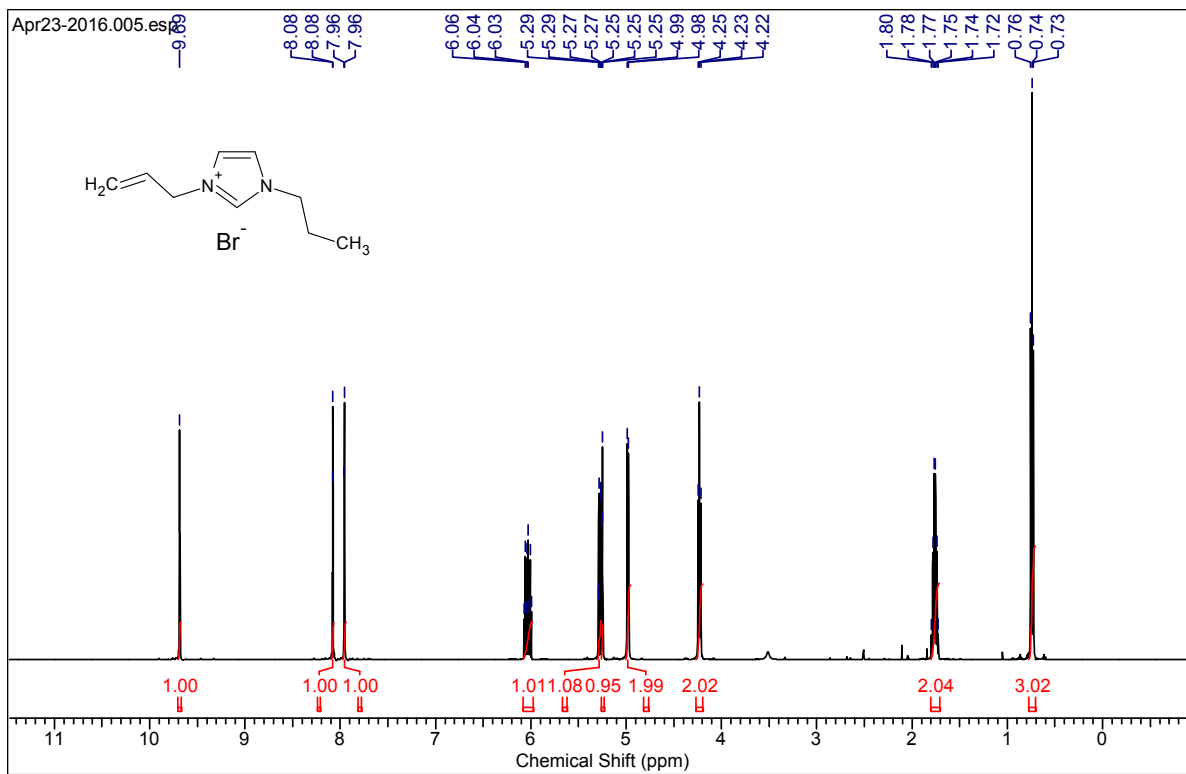

Figure SI-A9.  $^1\text{H-NMR}$  spectra of compound 5

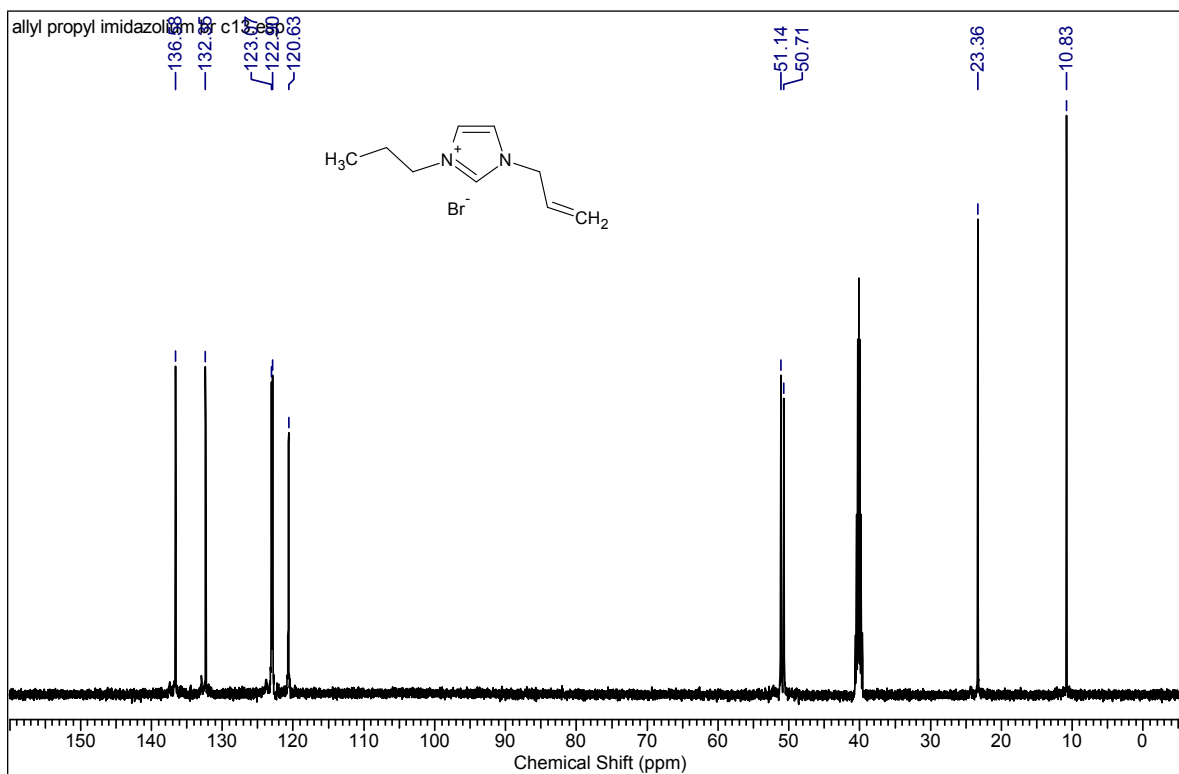

Figure SI-A10.  $^{13}\text{C-NMR}$  spectra of compound 5

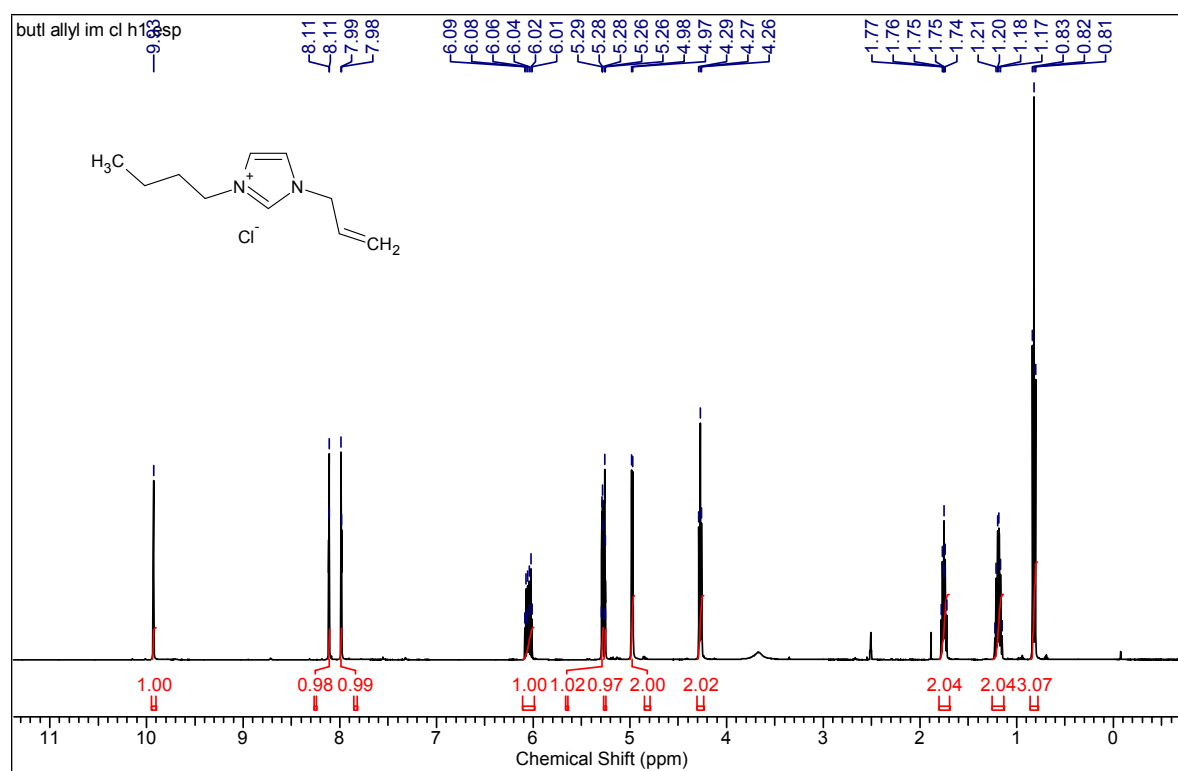

Figure SI-A11.  $^1\text{H}$ -NMR spectra of compound 6

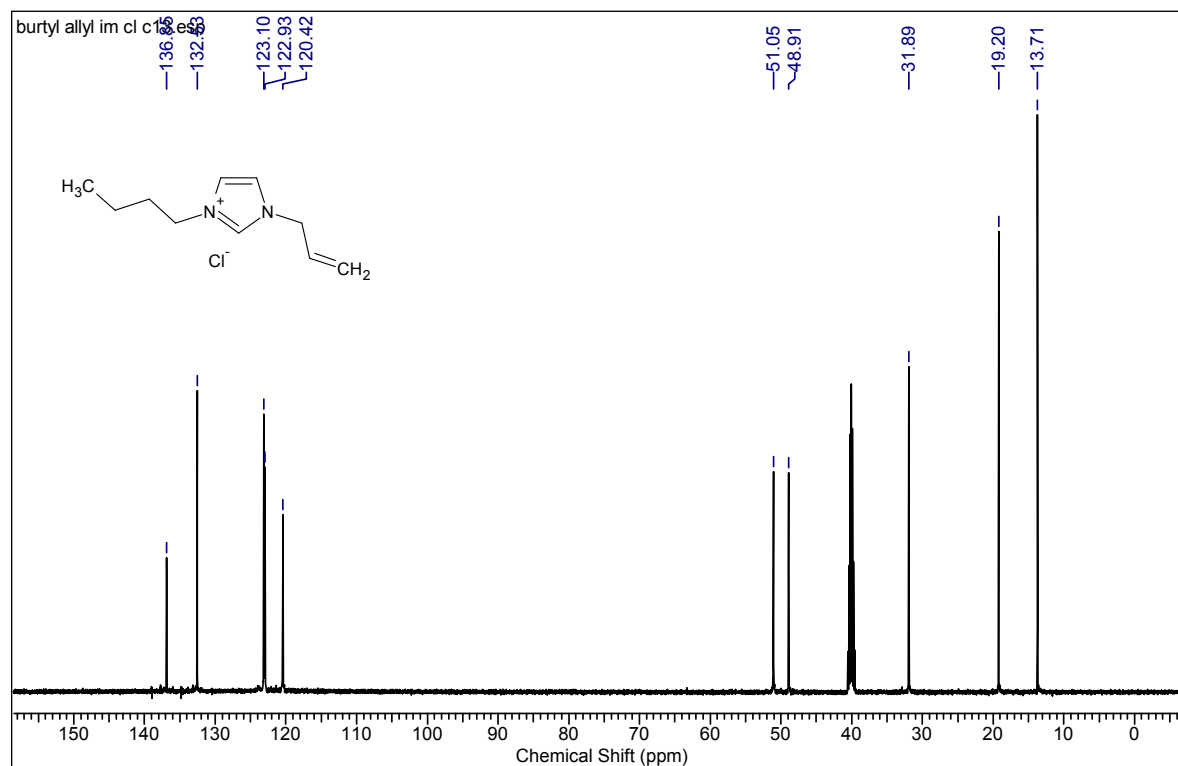

Figure SI-A12.  $^{13}\text{C}$ -NMR spectra of compound 6

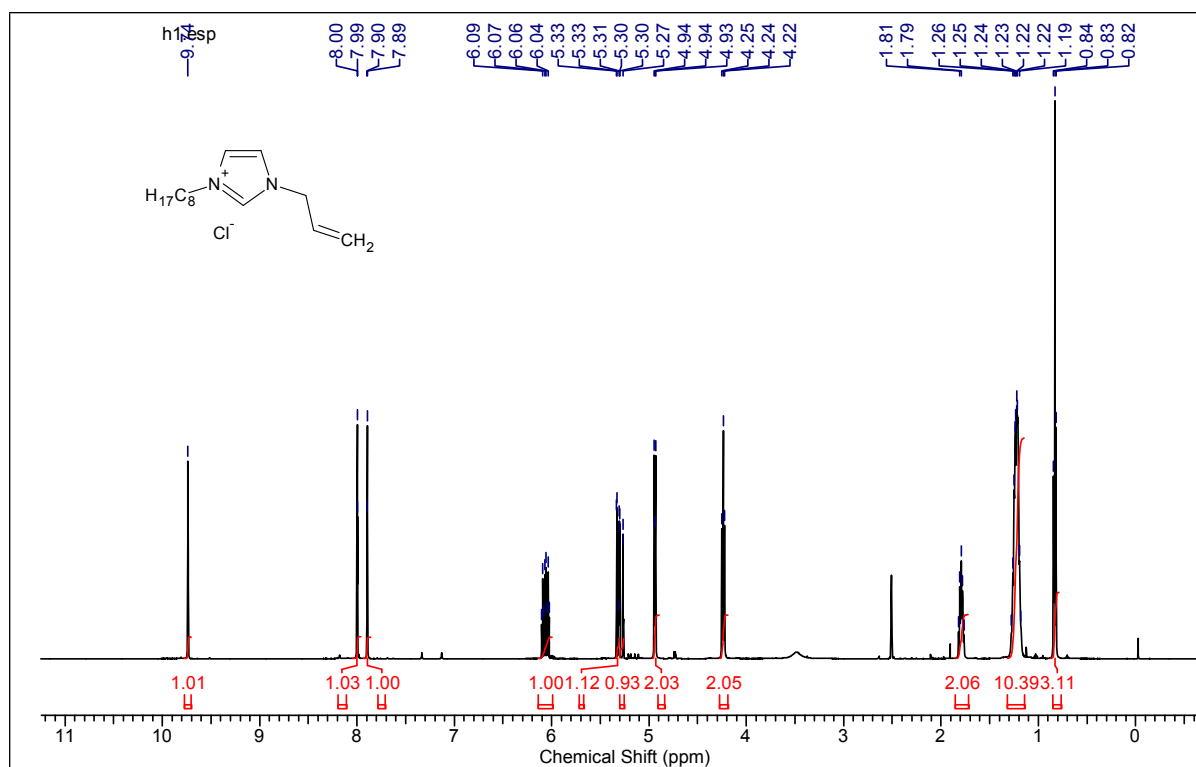

Figure SI-A13. <sup>1</sup>H-NMR spectra of compound 7

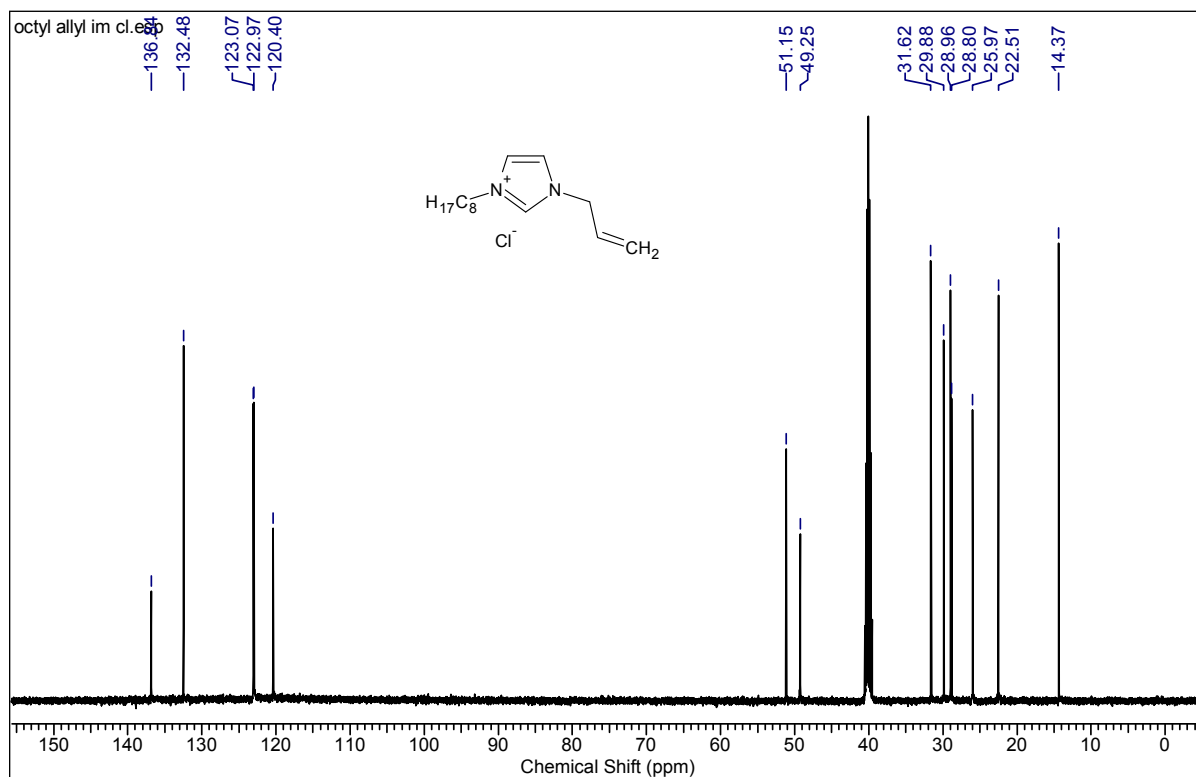

Figure SI-A14. <sup>13</sup>C-NMR spectra of compound 7



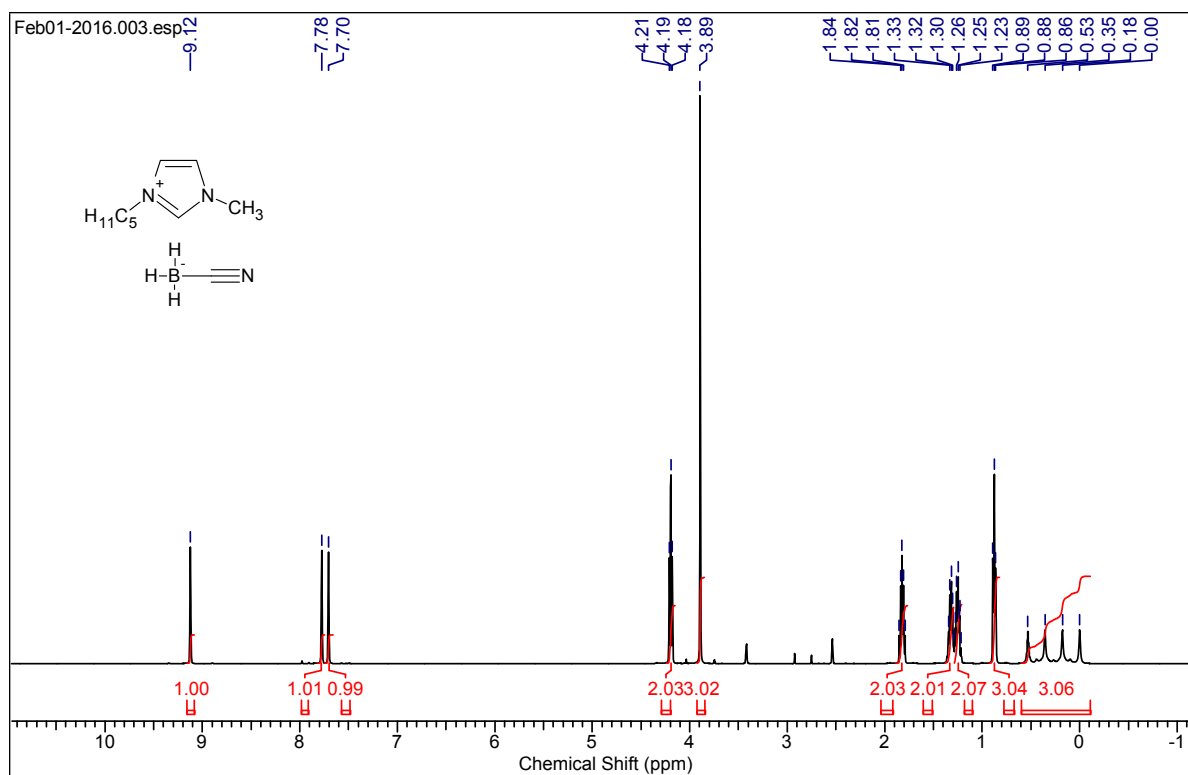

Figure SI-A15.  $^1\text{H}$ -NMR spectra of compound 8

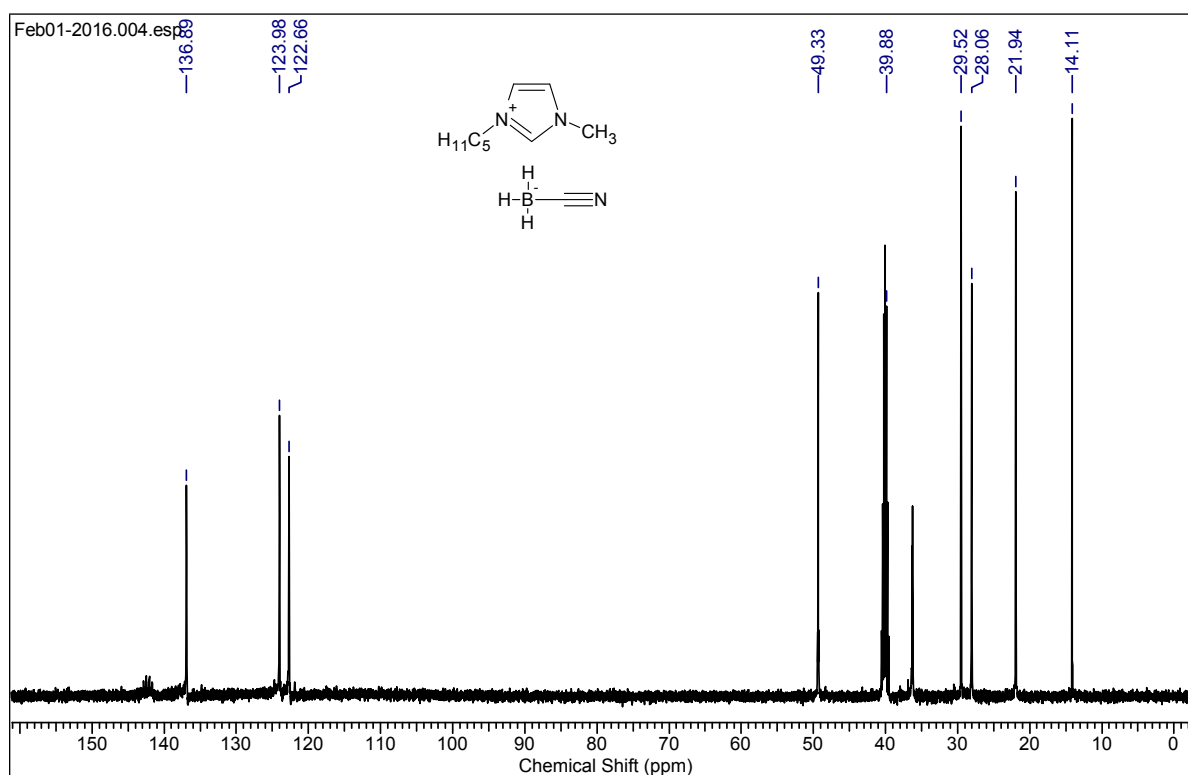

Figure SI-A16.  $^{13}\text{C}$ -NMR spectra of compound 8

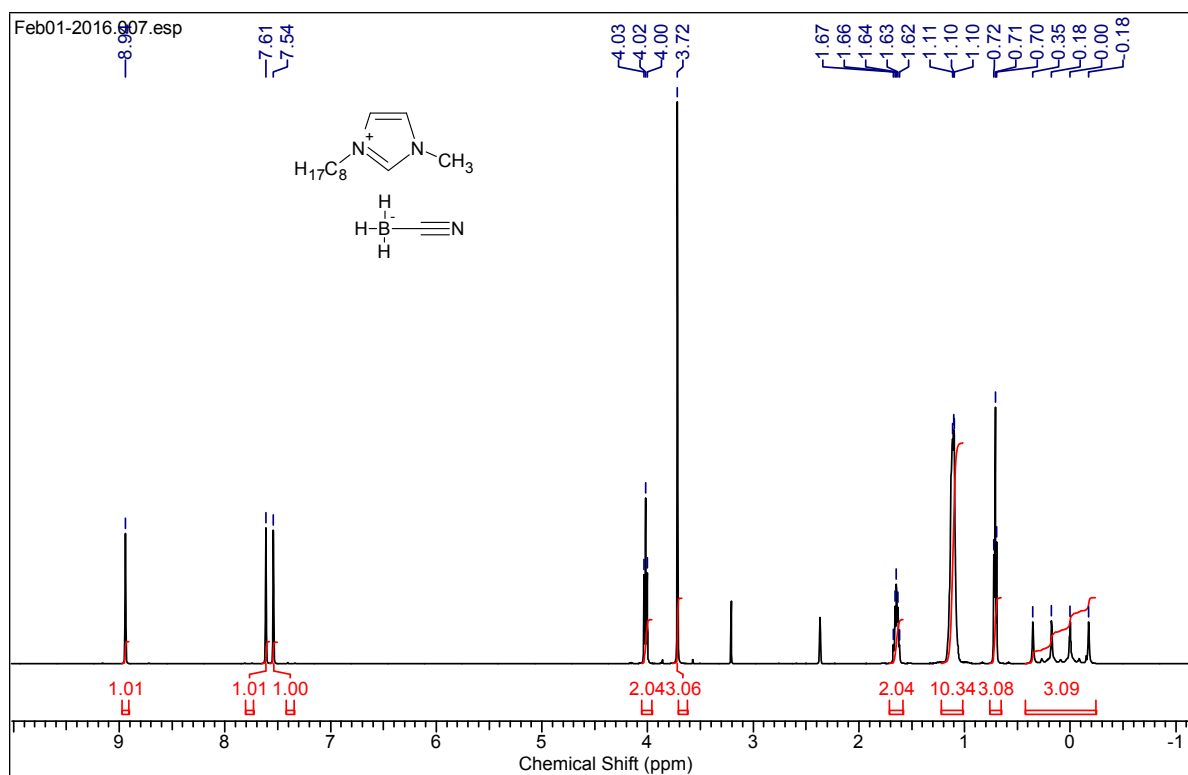

Figure SI-A17.  $^1\text{H}$ -NMR spectra of compound 9

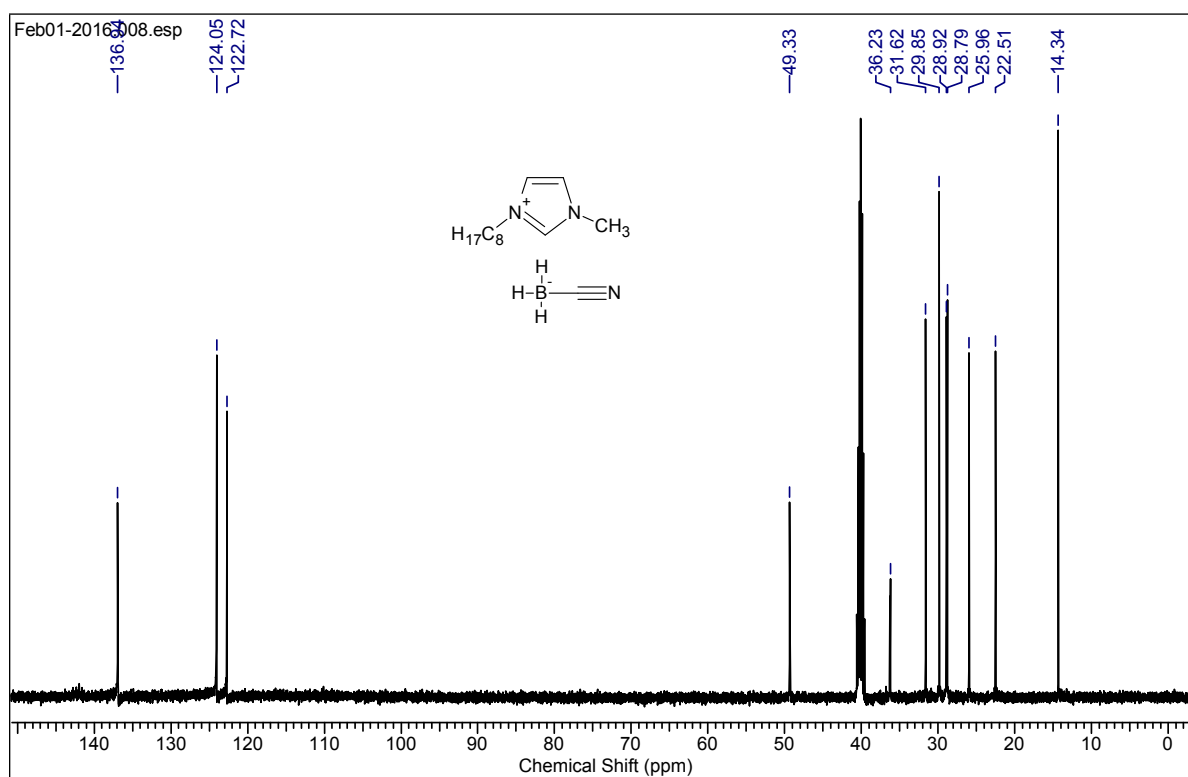

Figure SI-A18.  $^{13}\text{C}$ -NMR spectra of compound 9

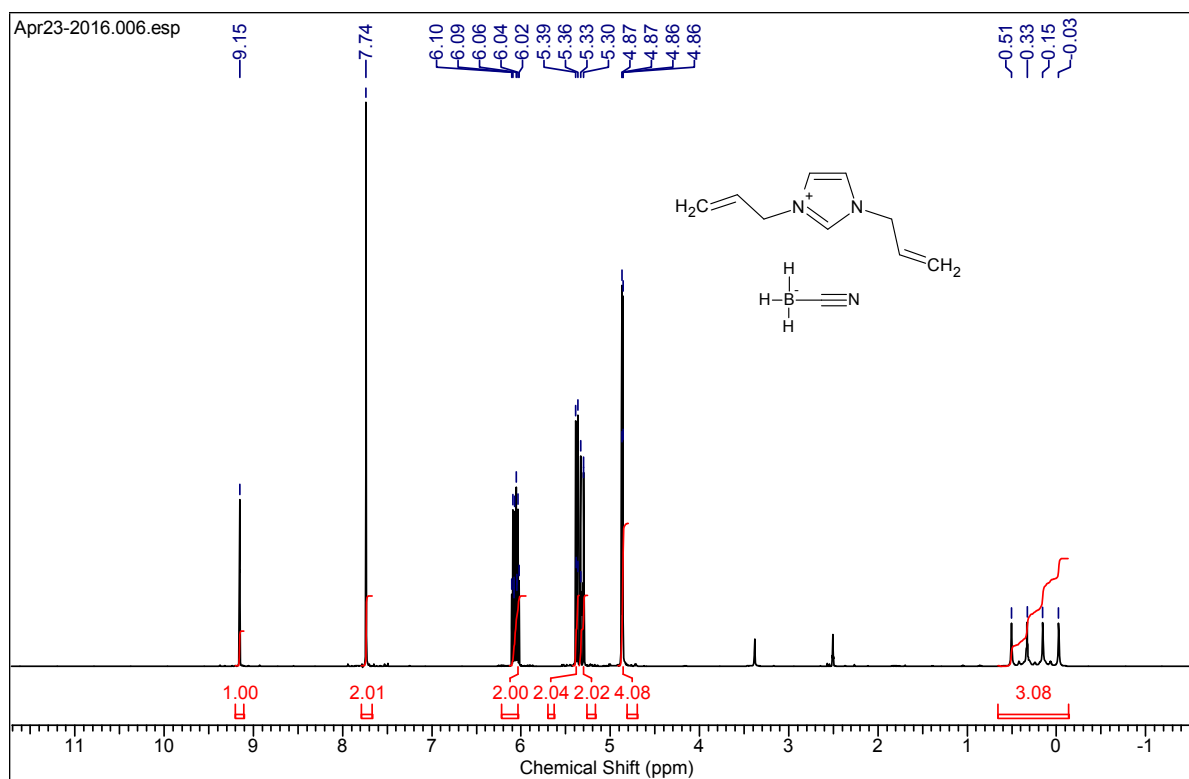

**Figure SI-A19.**  $^1\text{H}$ -NMR spectra of compound **10**

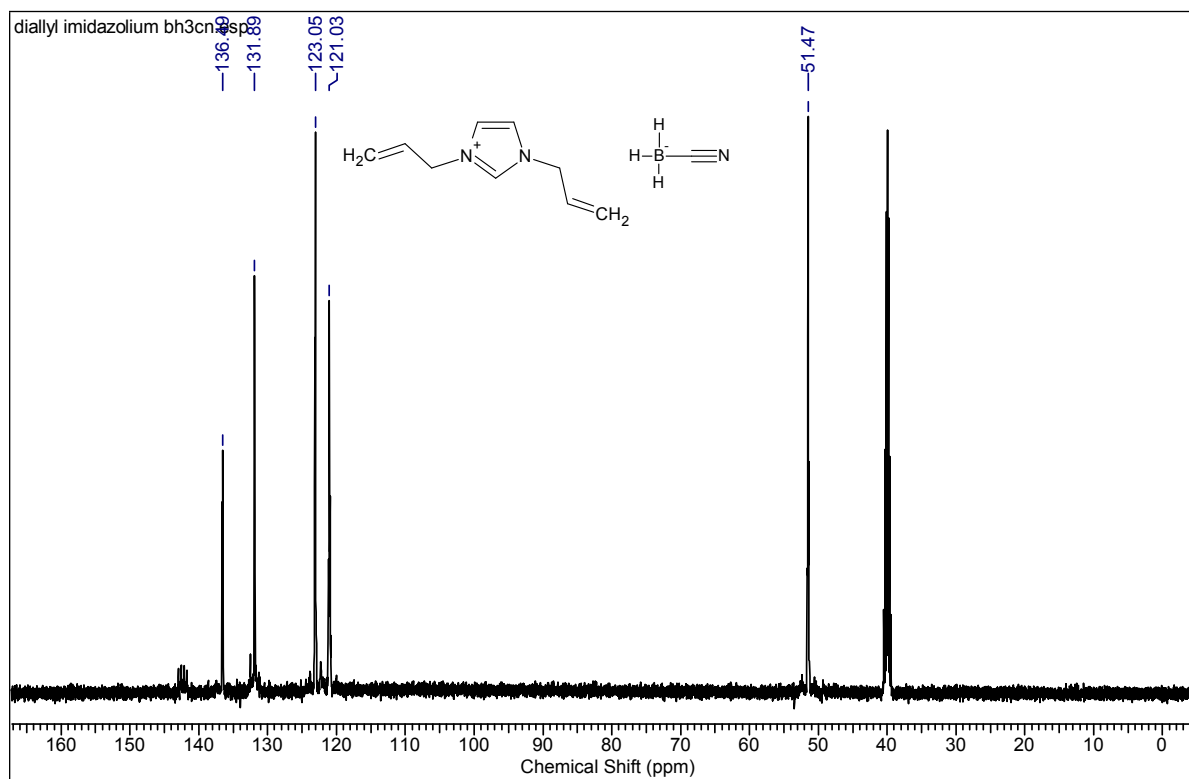

**Figure SI-A20.**  $^{13}\text{C}$ -NMR spectra of compound **10**

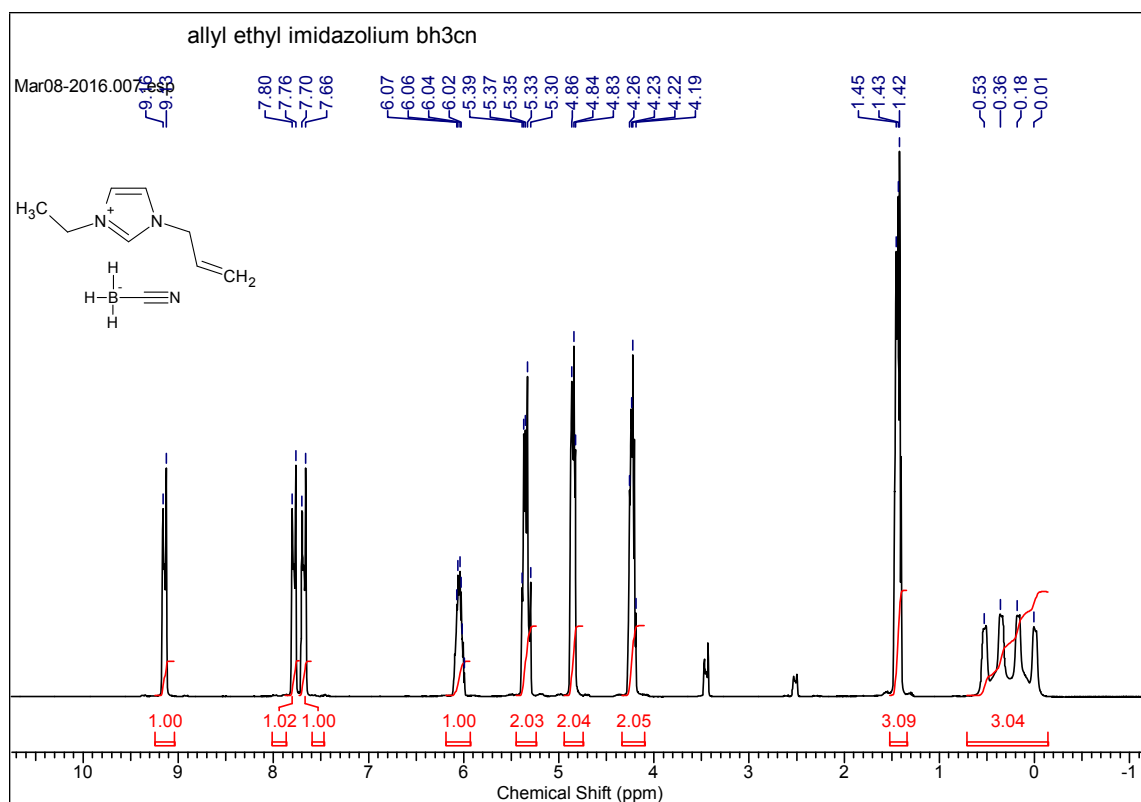

Figure SI-A21.  $^1\text{H}$ -NMR spectra of compound 11

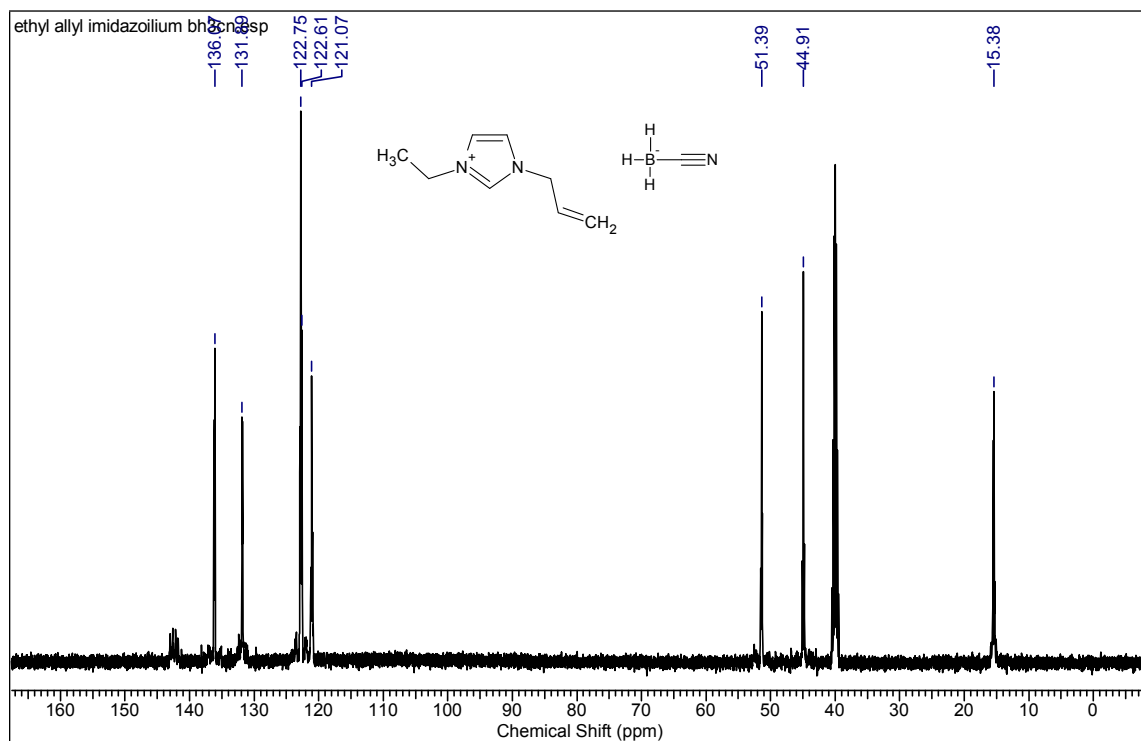

Figure SI-A22.  $^{13}\text{C}$ -NMR spectra of compound 11

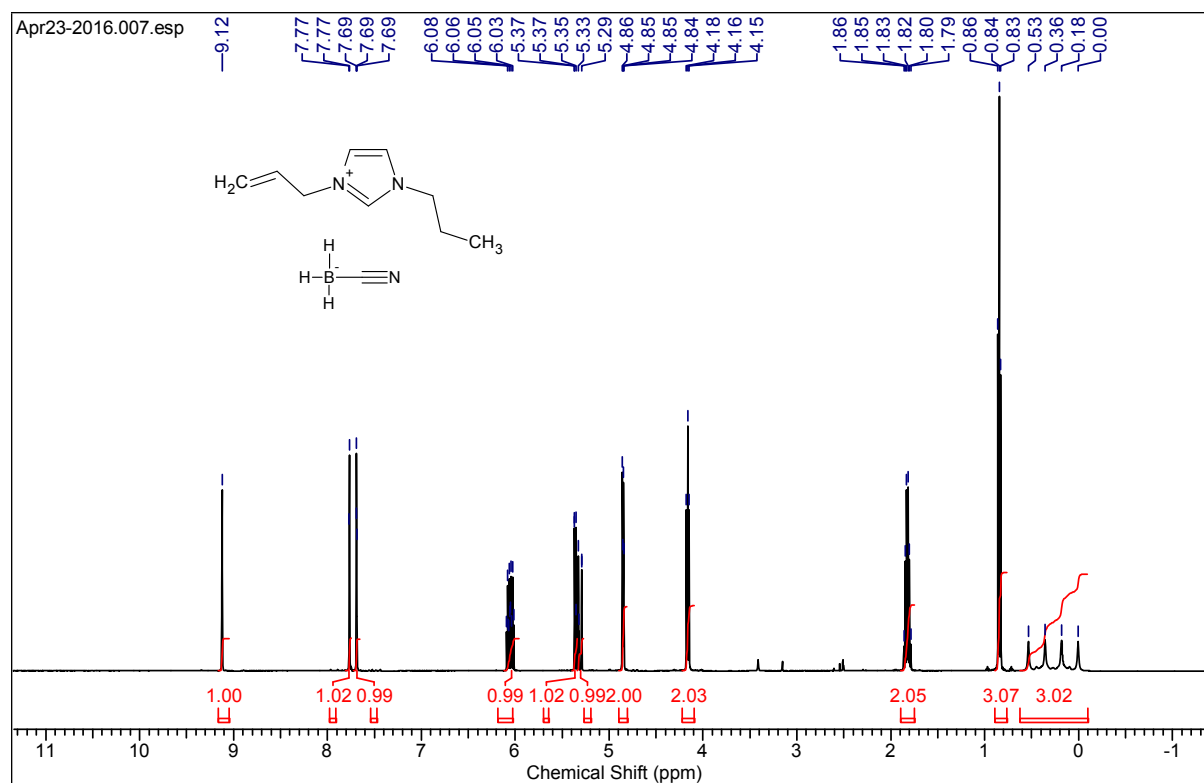

Figure SI-A23.  $^1\text{H}$ -NMR spectra of compound 12

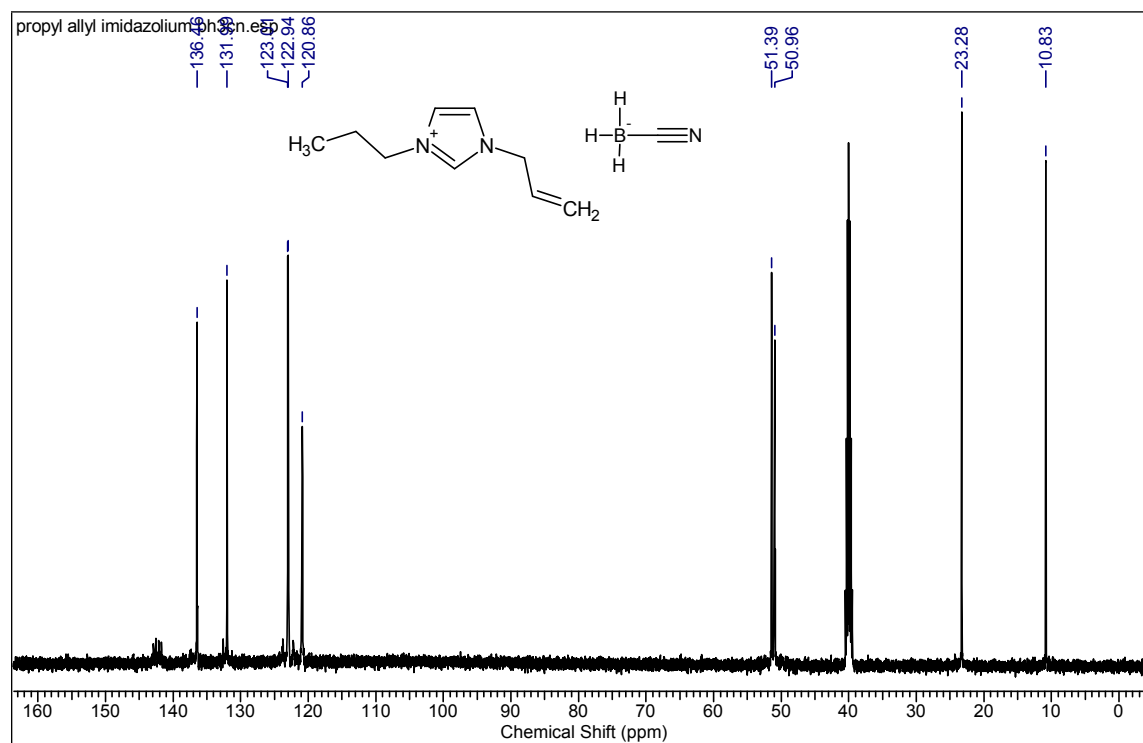

Figure SI-A24.  $^{13}\text{C}$ -NMR spectra of compound 12

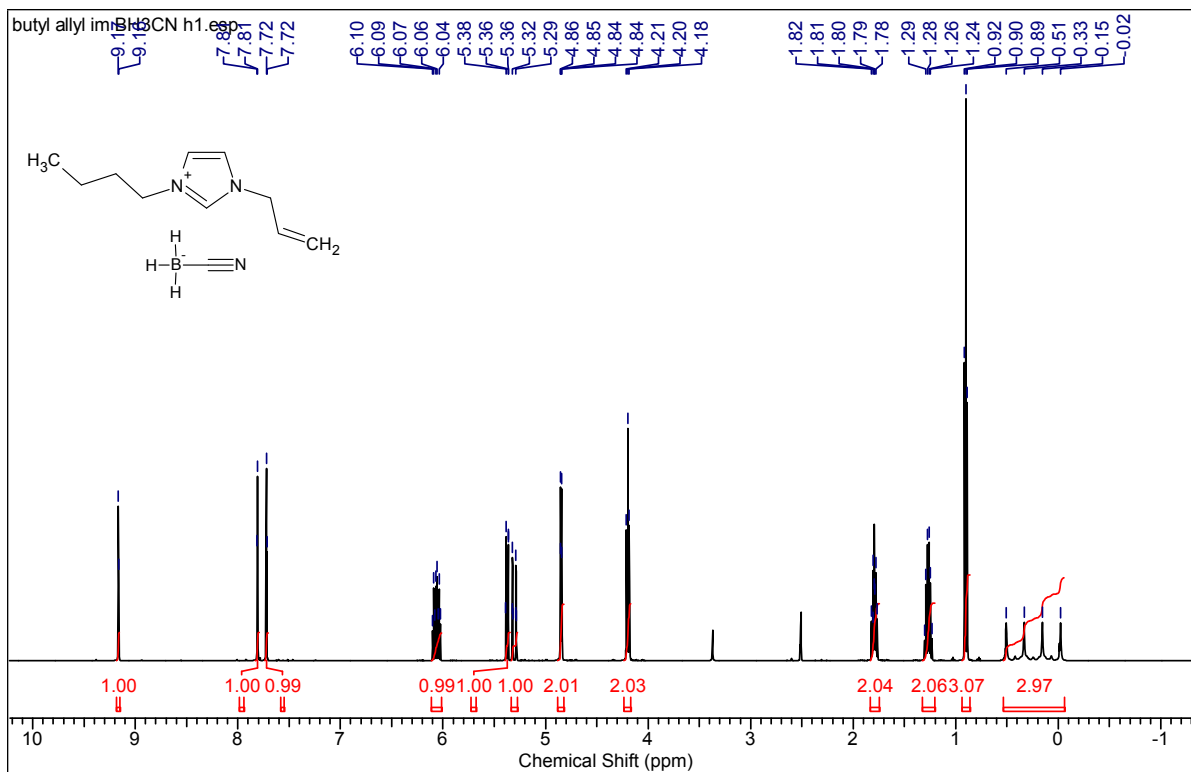

Figure SI-A25.  $^1\text{H}$ -NMR spectra of compound 13

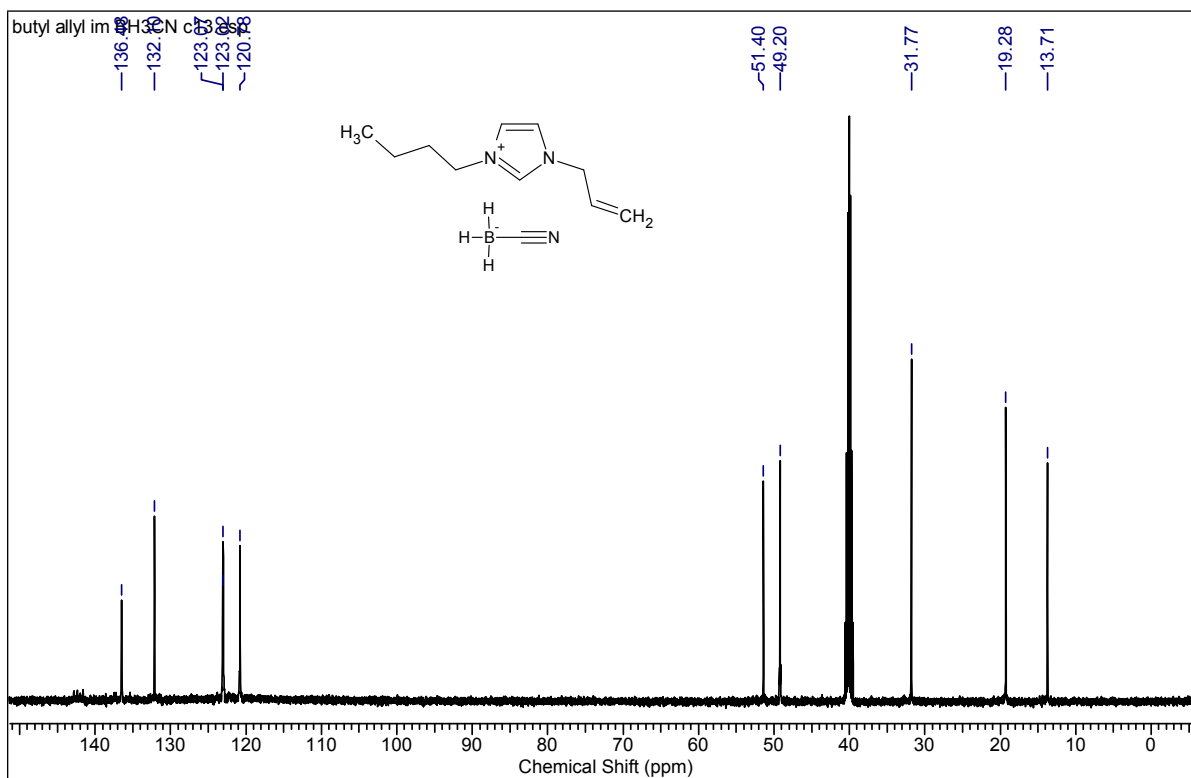

Figure SI-A26.  $^{13}\text{C}$ -NMR spectra of compound 13

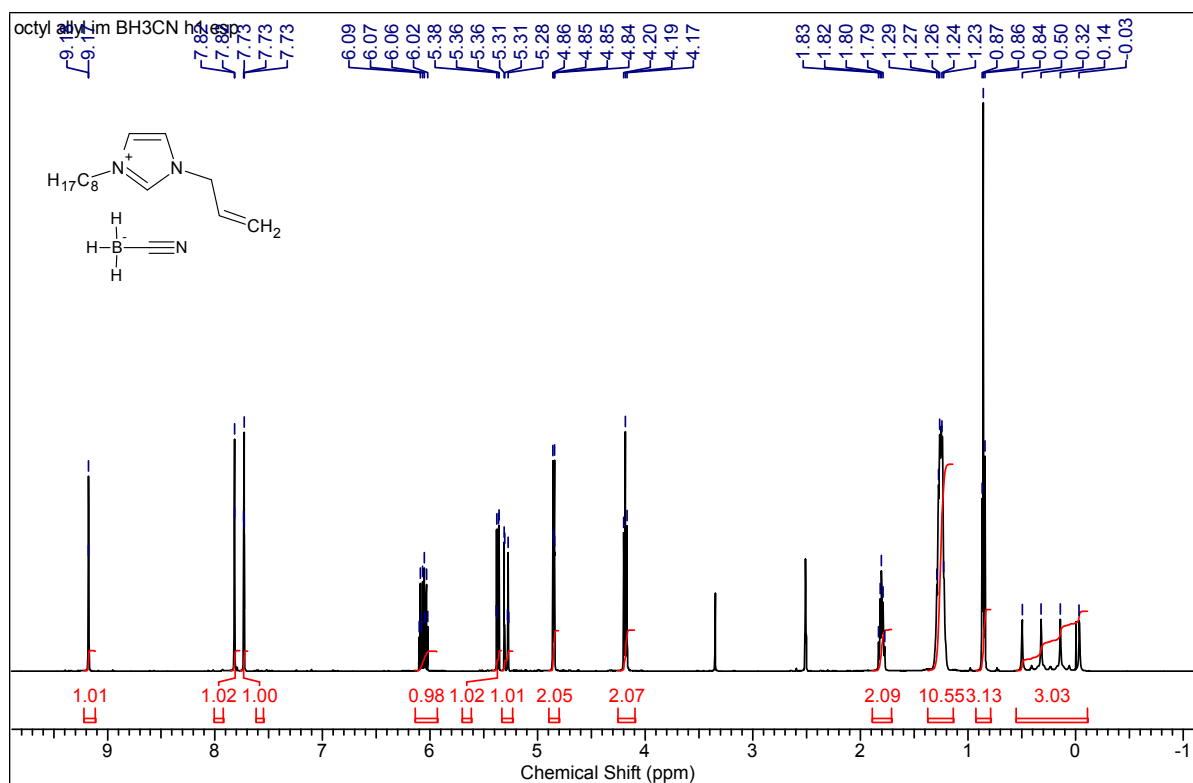

Figure SI-A27. <sup>1</sup>H-NMR spectra of compound 14

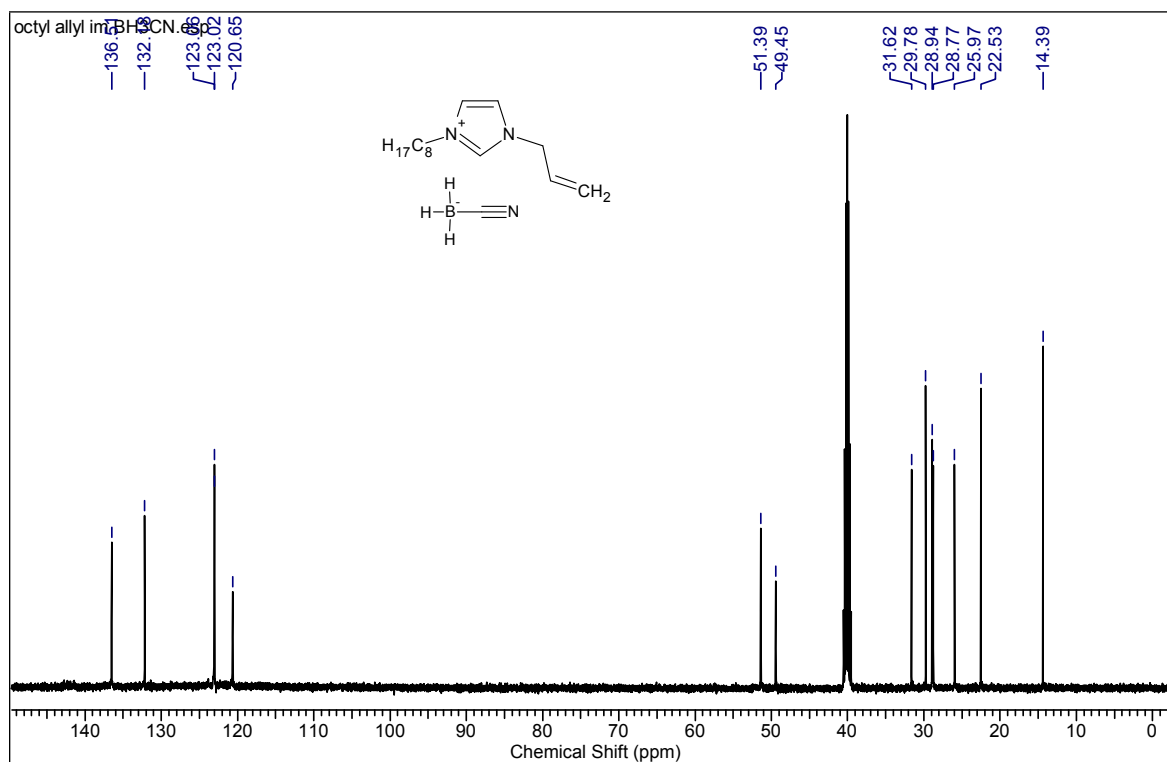

Figure SI-A28. <sup>13</sup>C-NMR spectra of compound 14

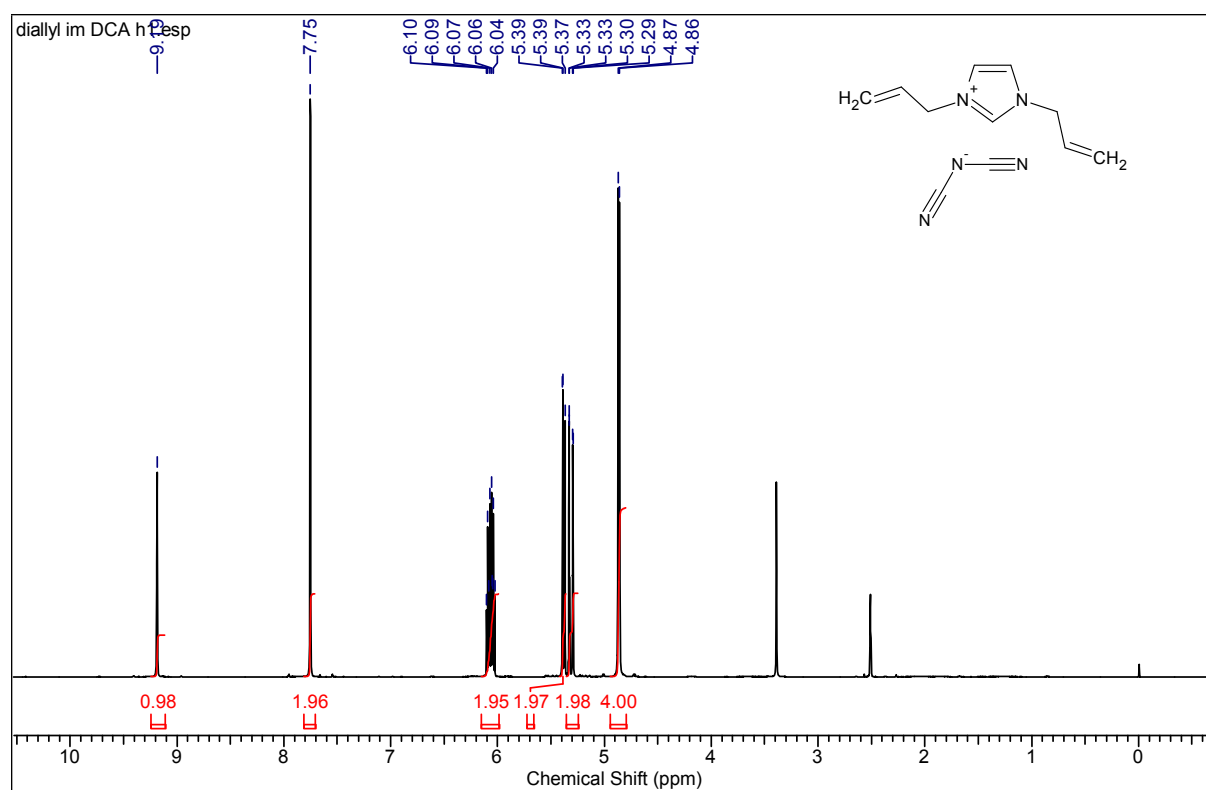

**Figure SI-A29.**  $^1\text{H}$ -NMR spectra of compound **15**

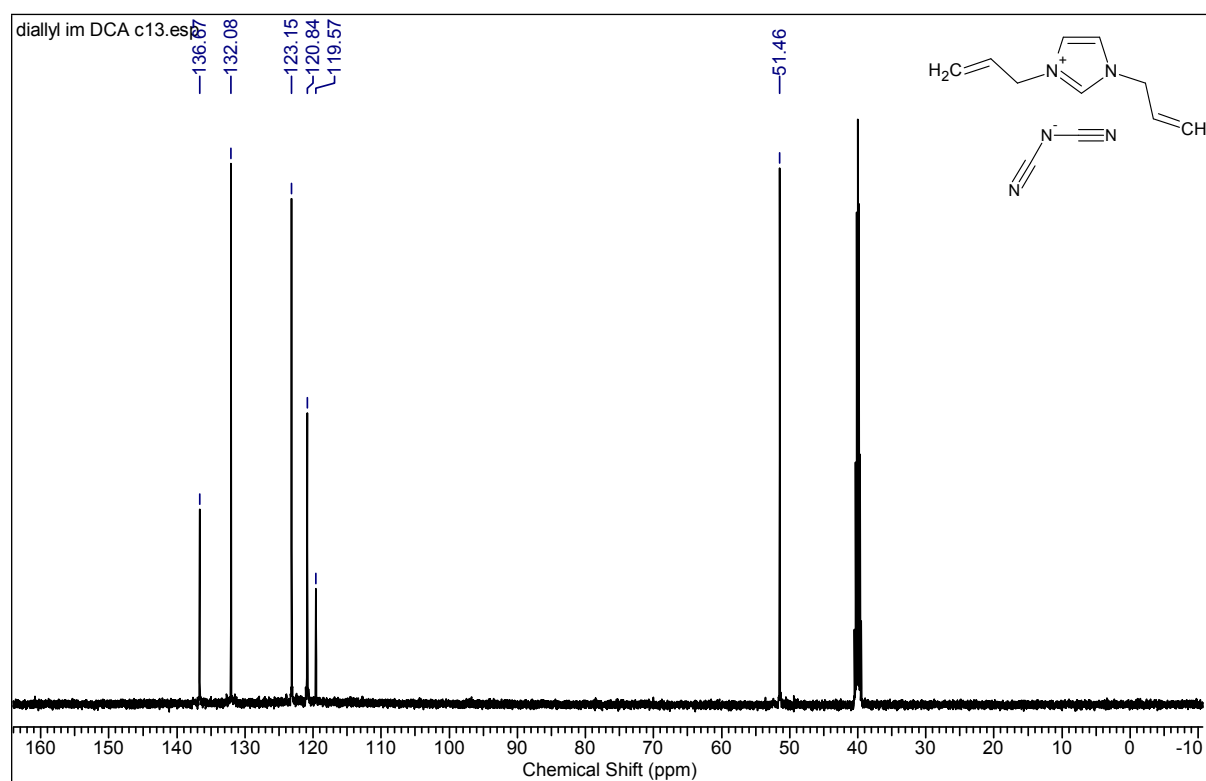

**Figure SI-A30.**  $^{13}\text{C}$ -NMR spectra of compound **15**



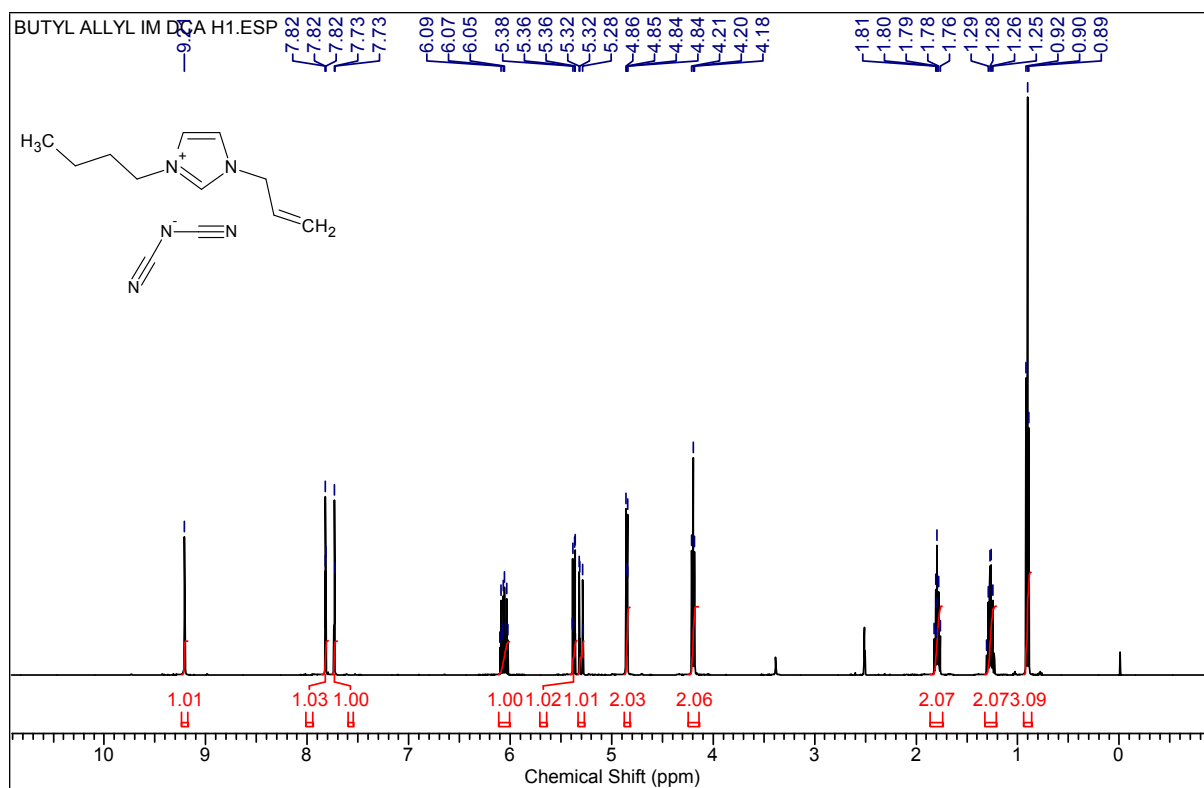

Figure SI-A31. <sup>1</sup>H-NMR spectra of compound 16

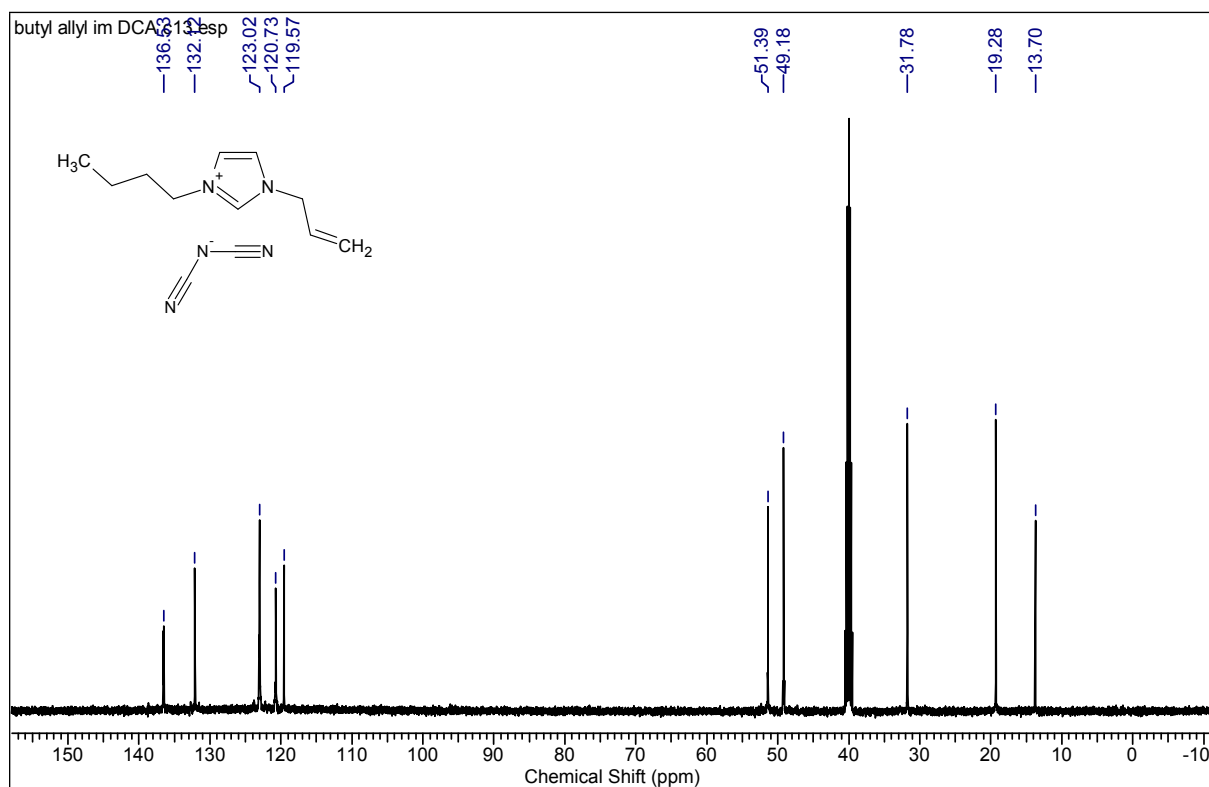

Figure SI-A32. <sup>13</sup>C-NMR spectra of compound 16

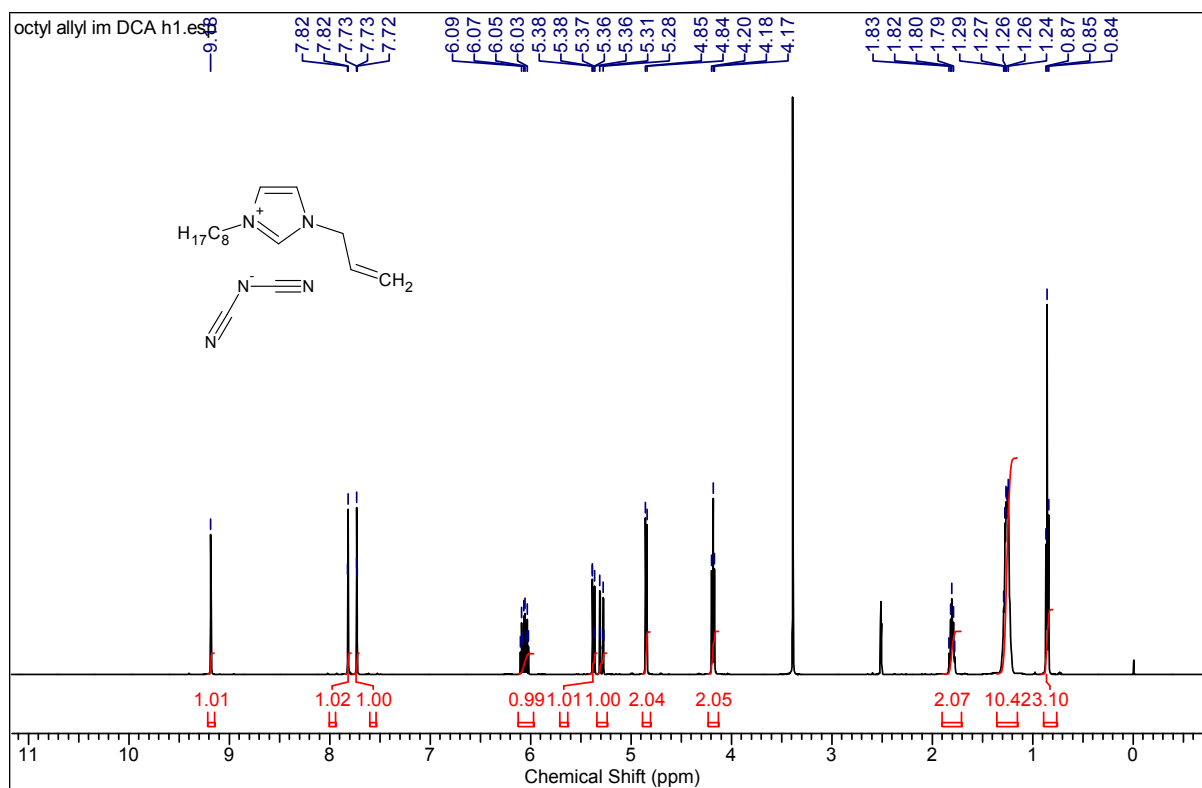

Figure SI-A33.  $^1\text{H}$ -NMR spectra of compound 17

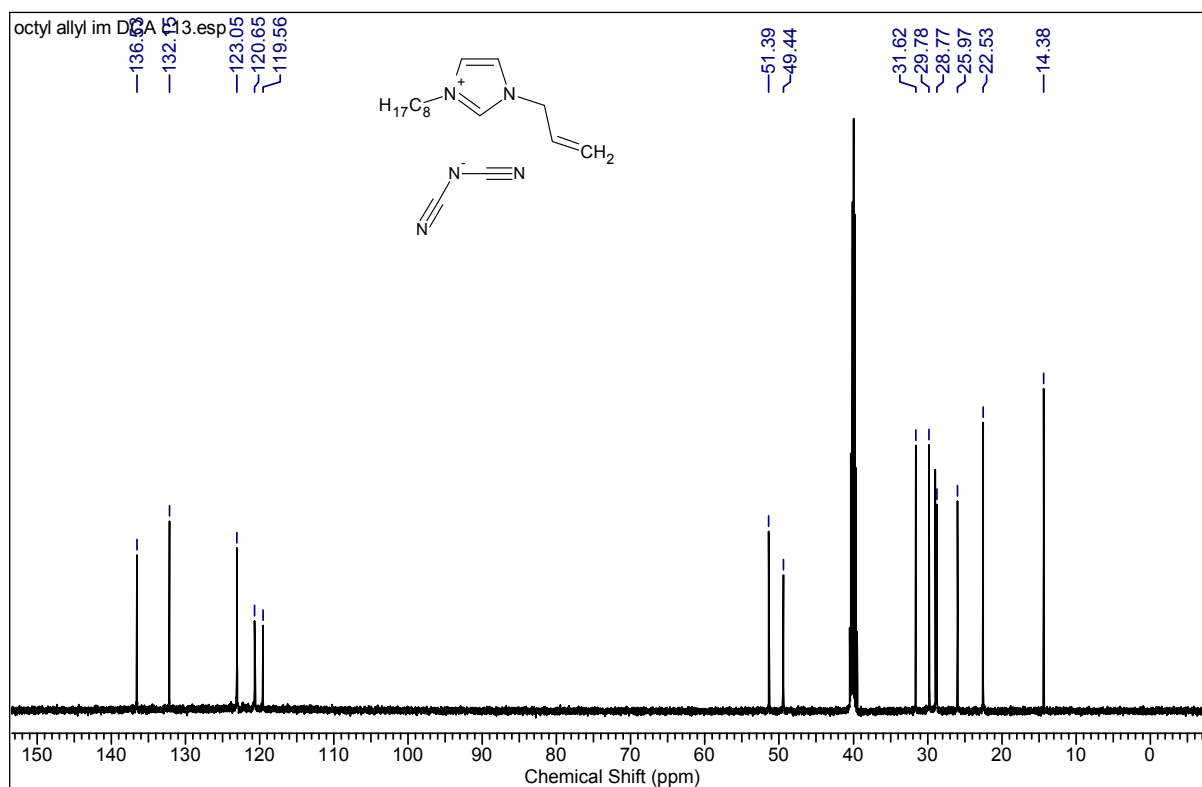

Figure SI-A34.  $^{13}\text{C}$ -NMR spectra of compound 17

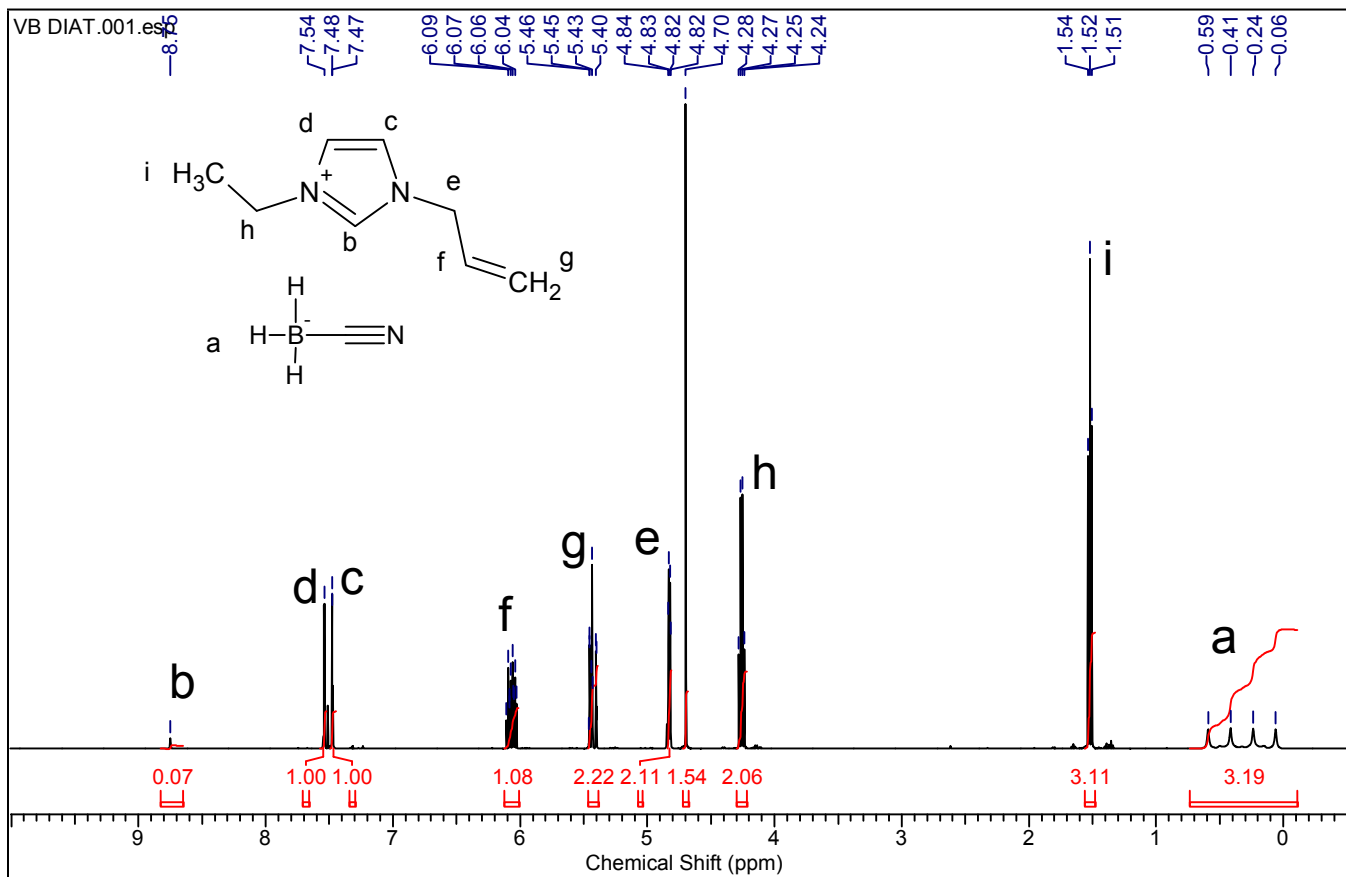

**Figure SI-A35.**  $^1\text{H}$ -NMR spectra of compound **11** in  $\text{D}_2\text{O}$

## SI- B. DSC & TGA-DTA study of ionic liquids (8-17)

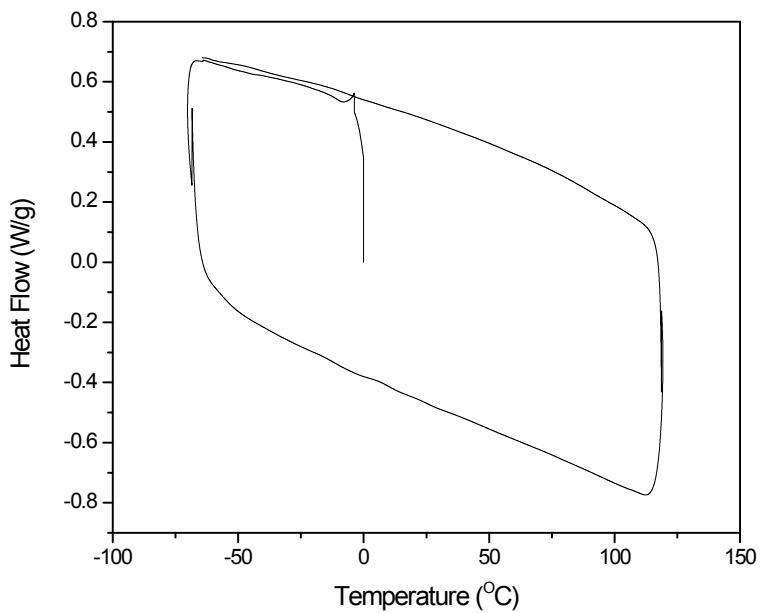

Figure SI-B1. DSC of compound 8

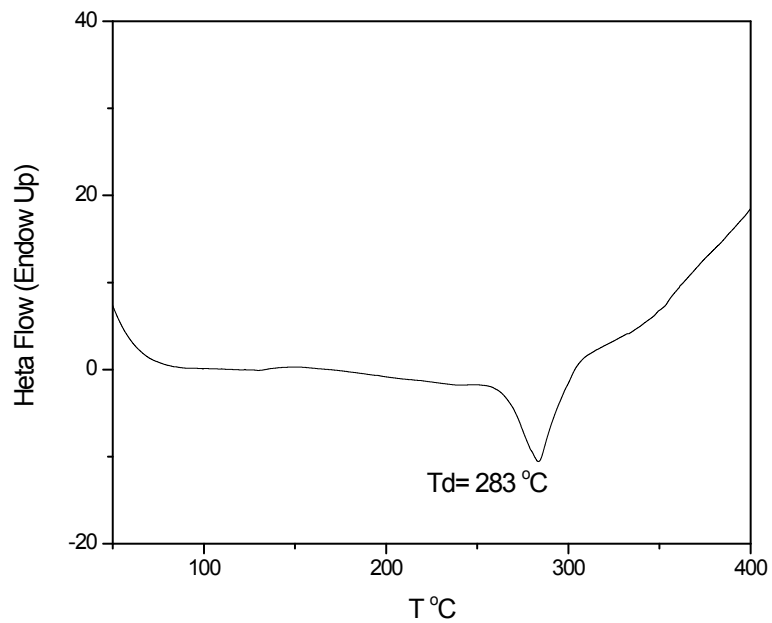

**Figure SI-B2.** DTA of compound **8**

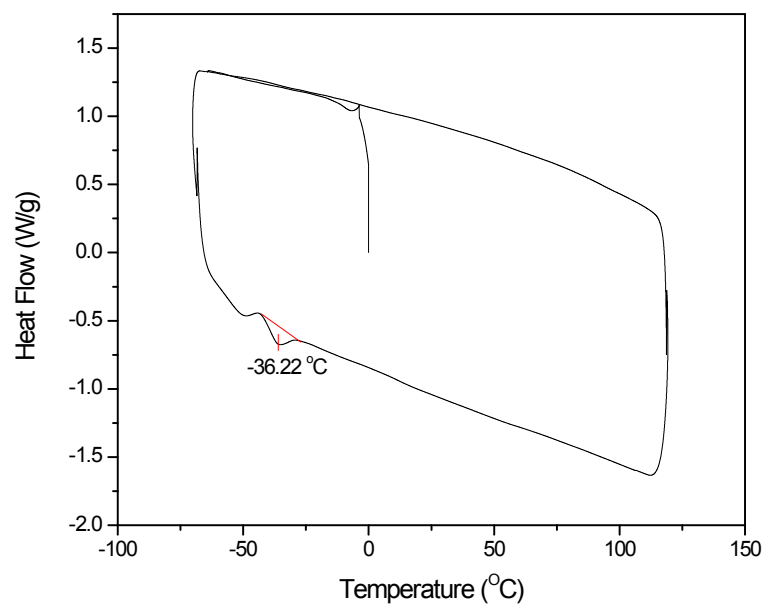

**Figure SI-B3.** DSC of compound **9**

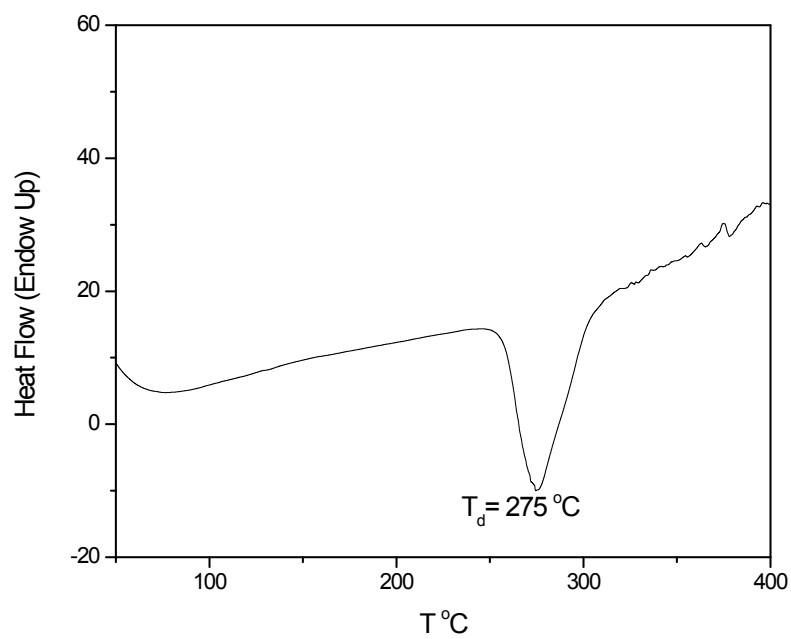

**Figure SI-B4.** DTA of compound **9**

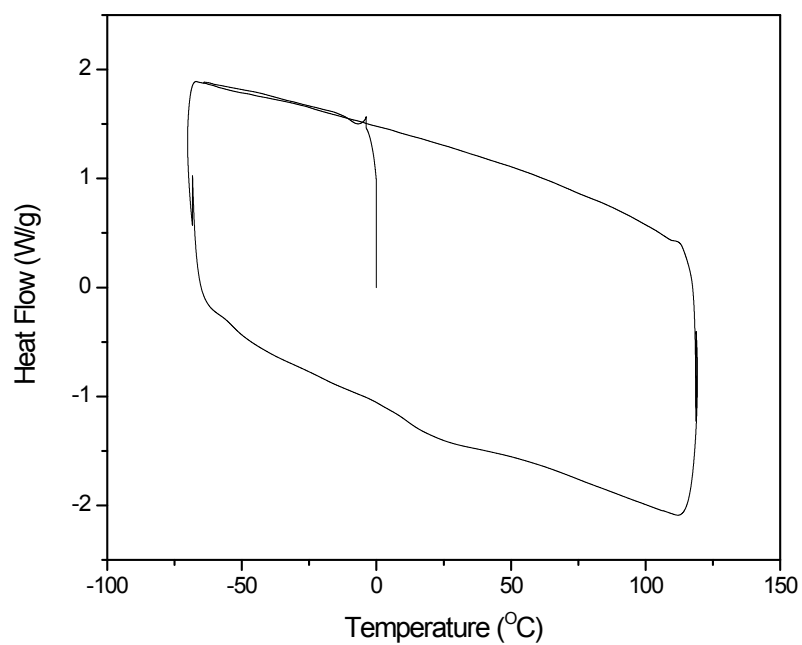

**Figure SI-B5.** DSC of compound **10**

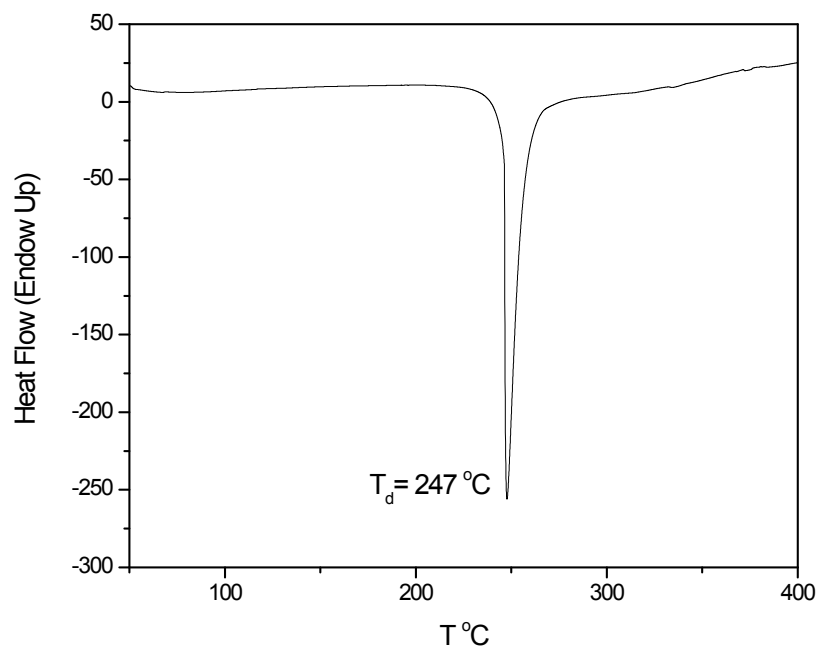

**Figure SI-B6.** DTA of compound **10**

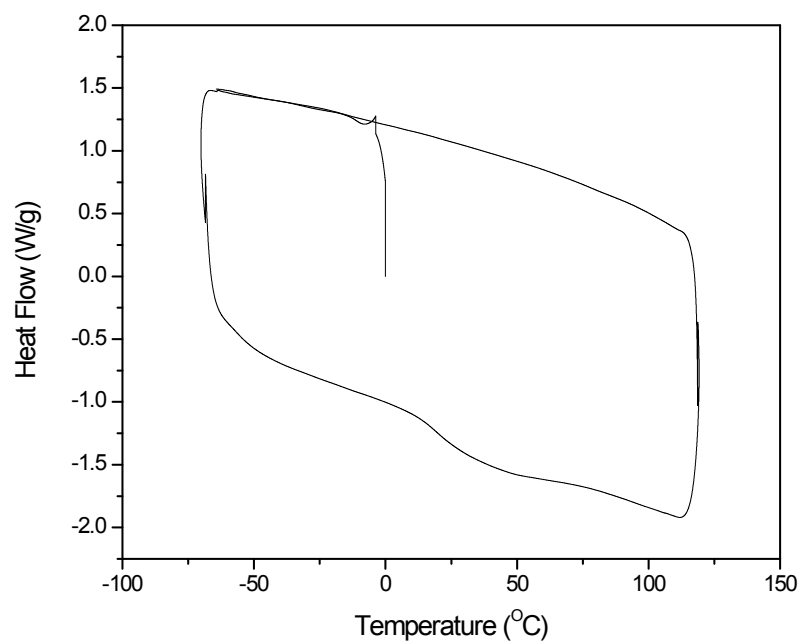

Figure SI-B7. DSC of compound 11

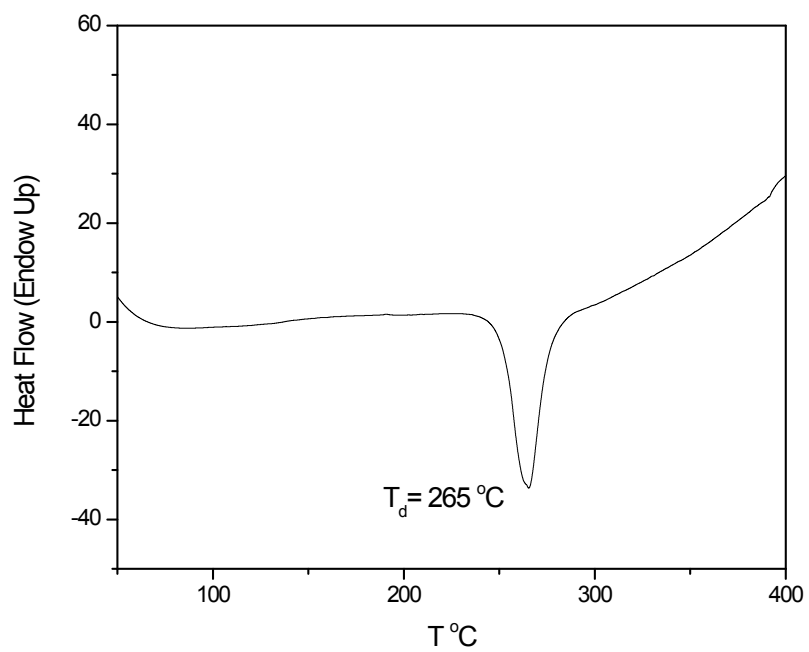

Figure SI-B8. DTA of compound 11

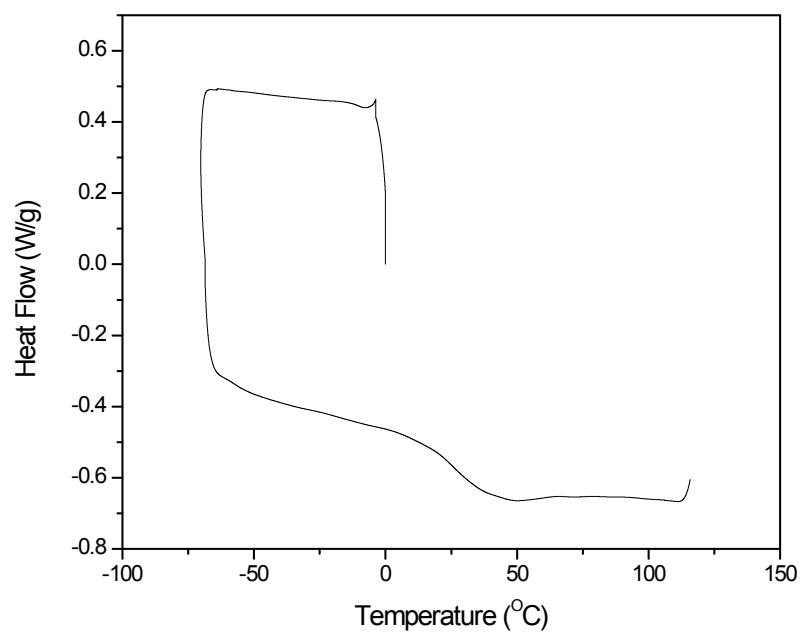

**Figure SI-B9.** DSC of compound **12**

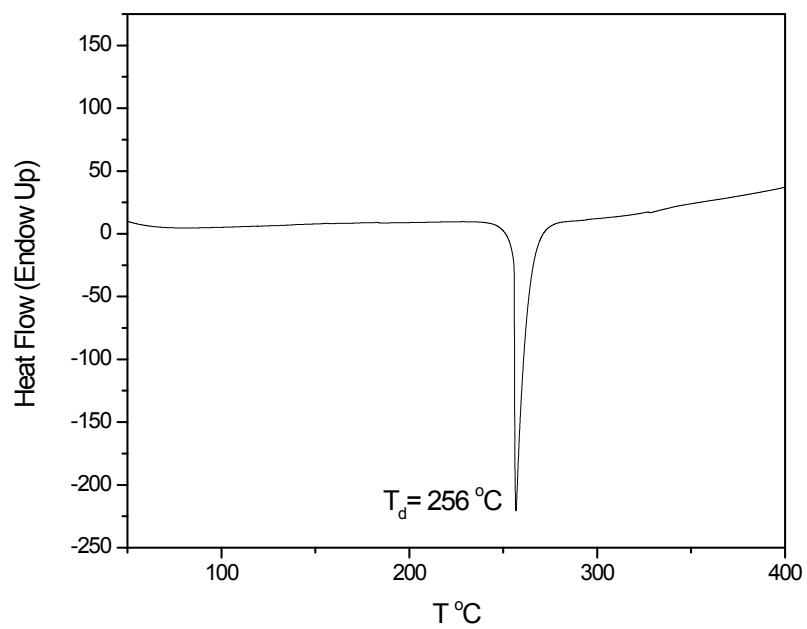

**Figure SI-B10.** DTA of compound **12**



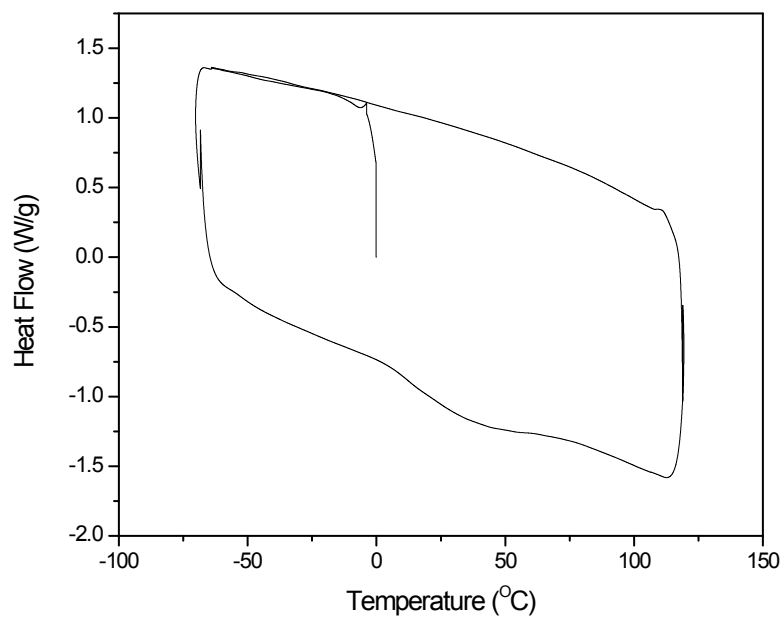

Figure SI-B11. DSC of compound 13

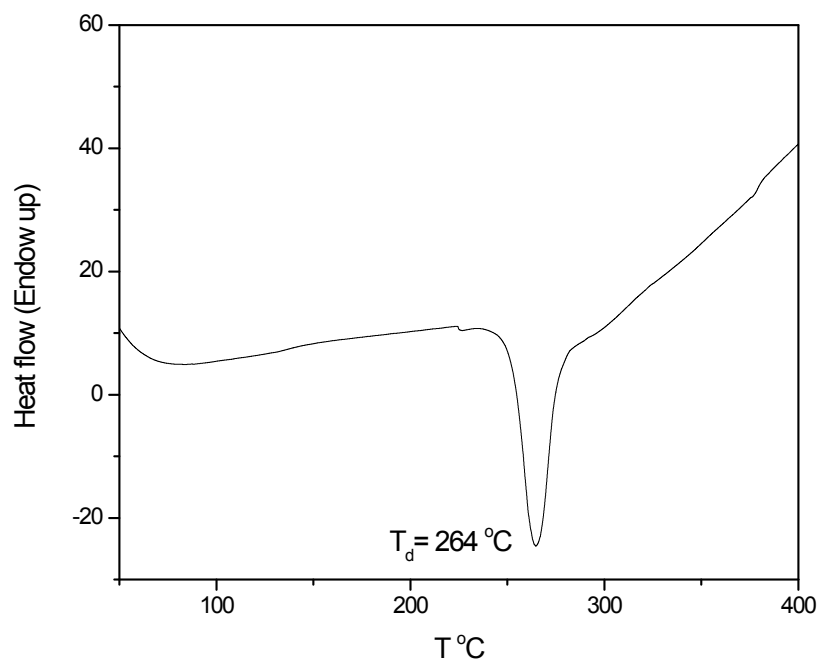

Figure SI-B12. DTA of compound 13

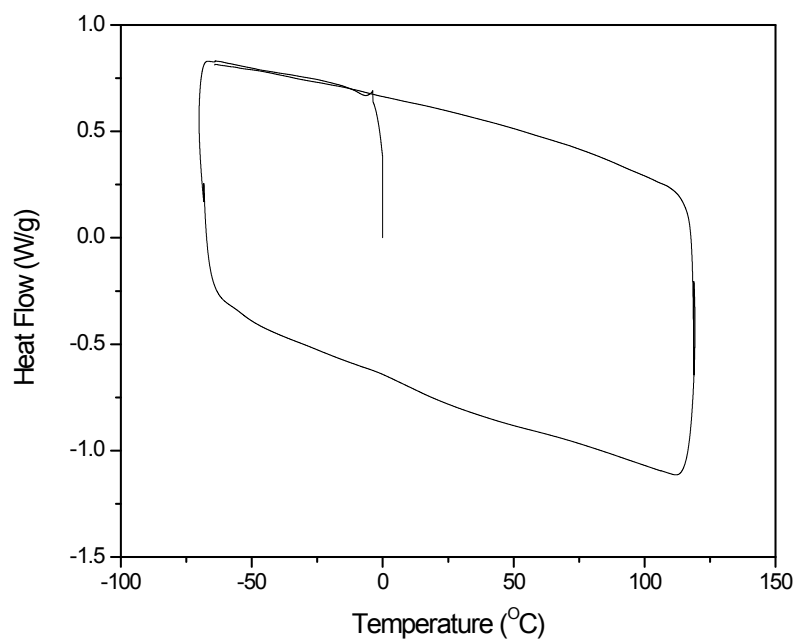

**Figure SI-B13.** DSC of compound **14**

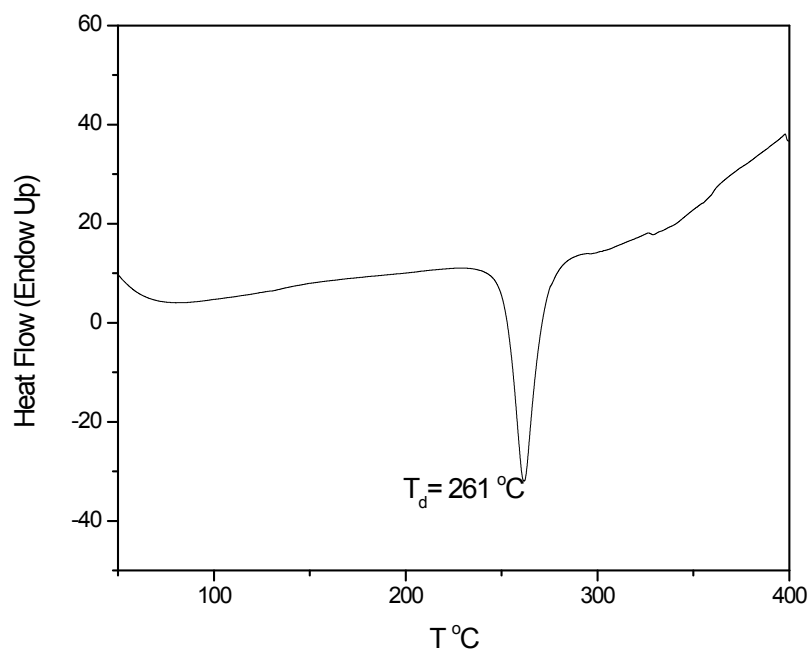

**Figure SI-B14.** DTA of compound **14**

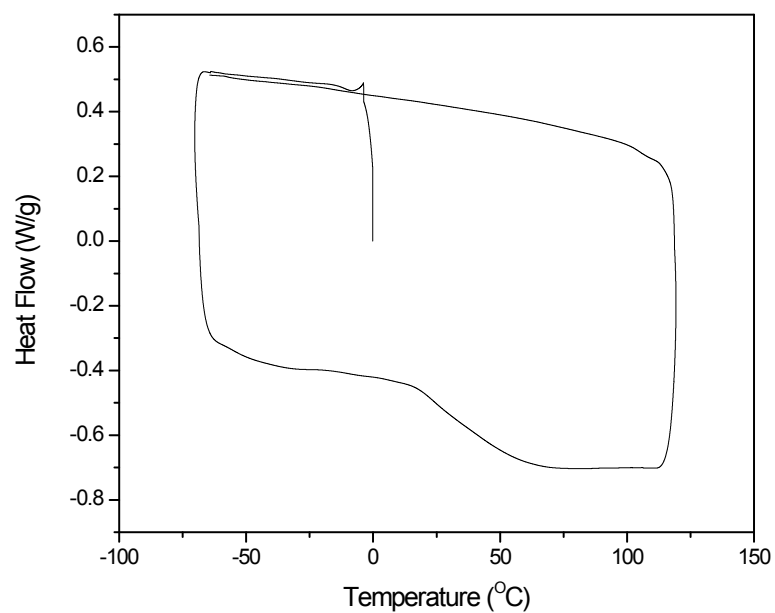

**Figure SI-B15.** DSC of compound **15**

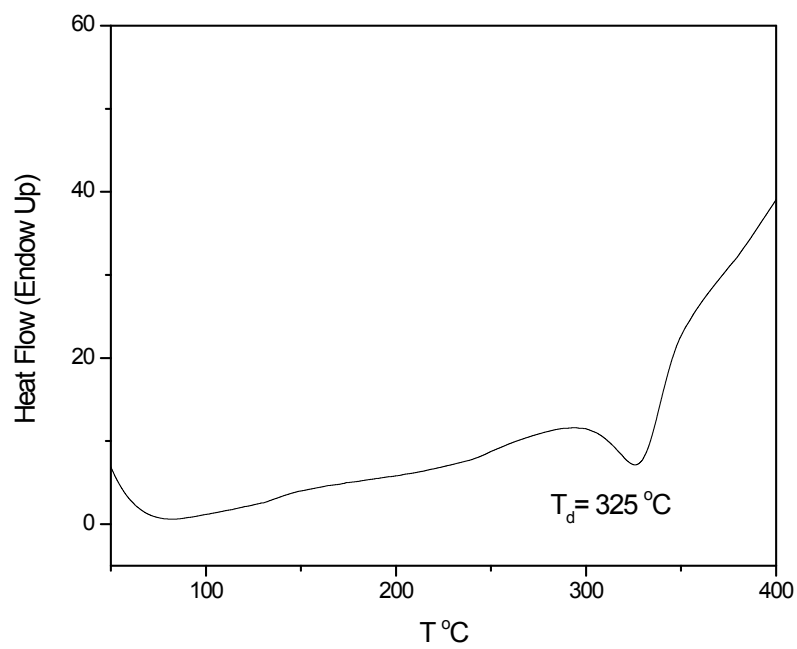

**Figure SI-B16.** DTA of compound **15**

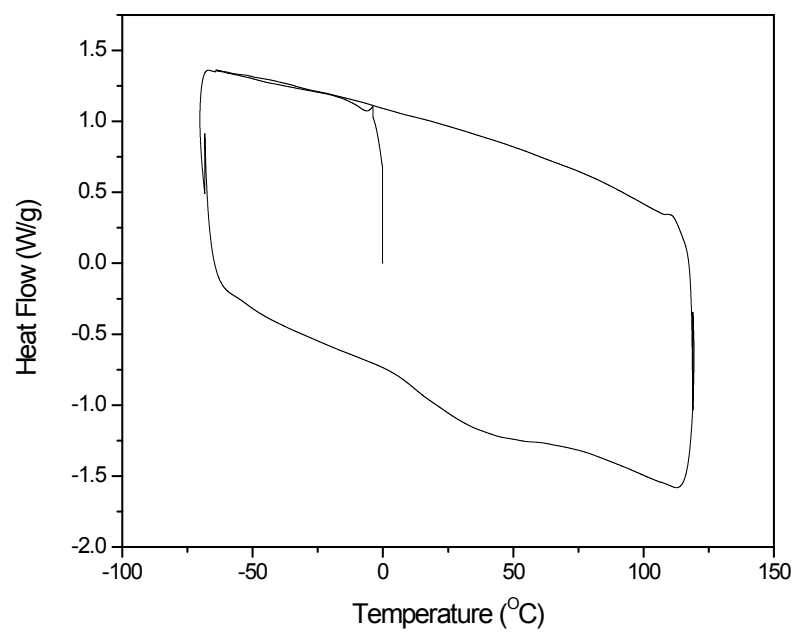

**Figure SI-B17.** DSC of compound **16**

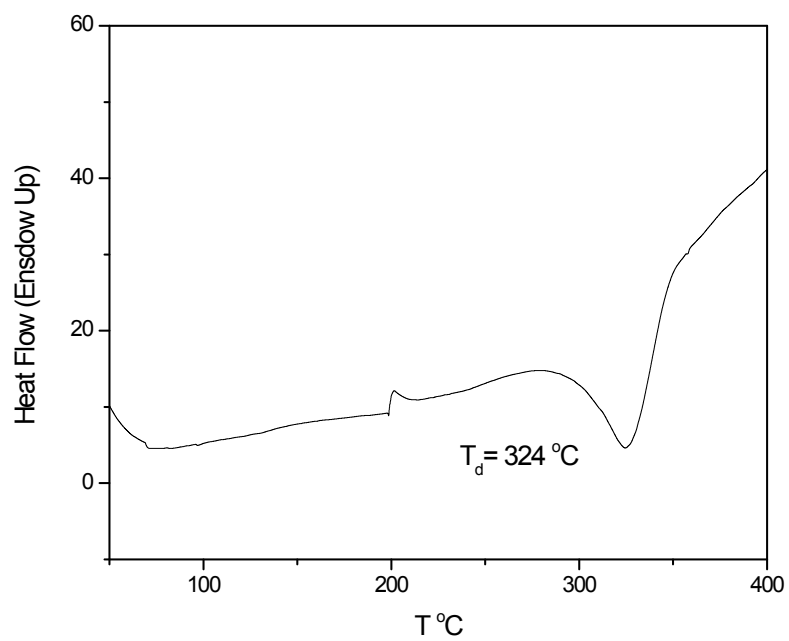

**Figure SI-B18.** DTA of compound **16**

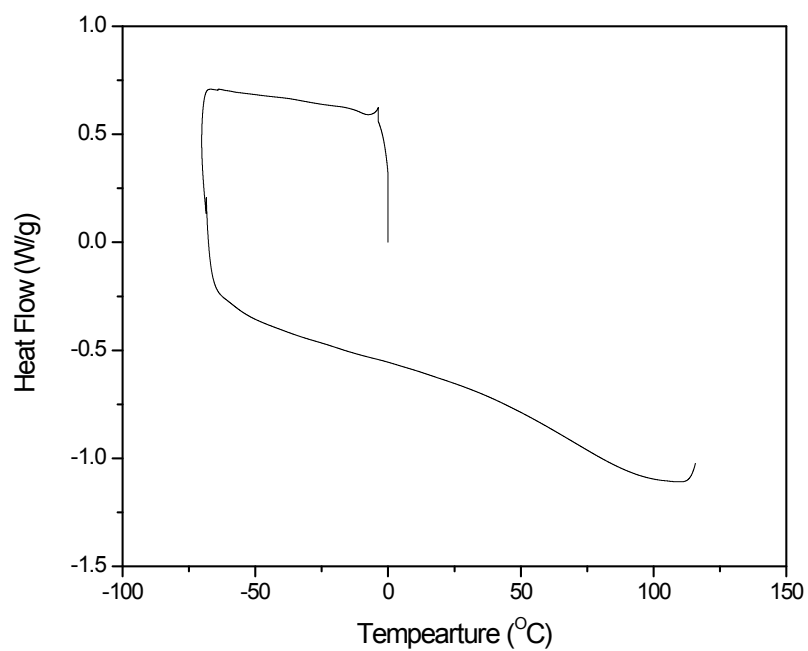

**Figure SI-B19.** DSC of compound **17**

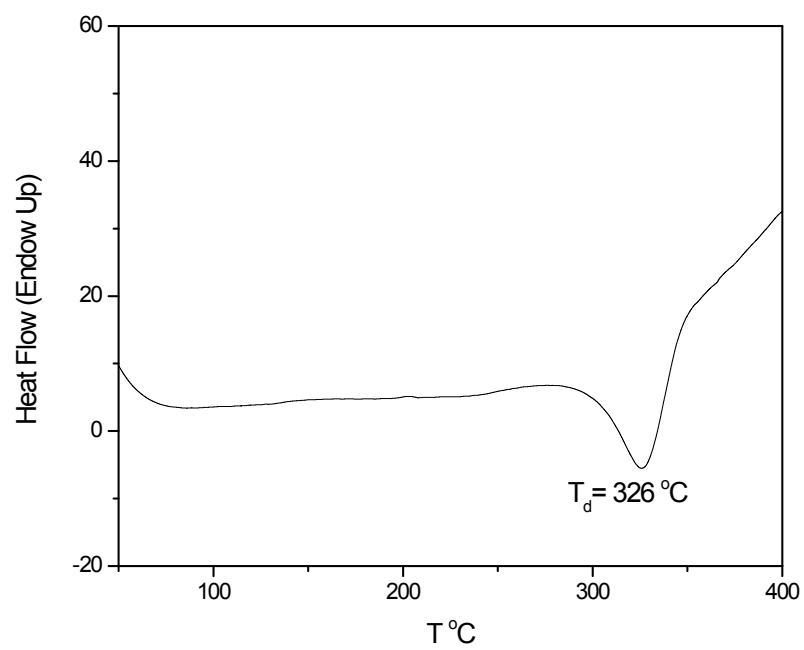

**Figure SI-B20.** DTA of compound **17**

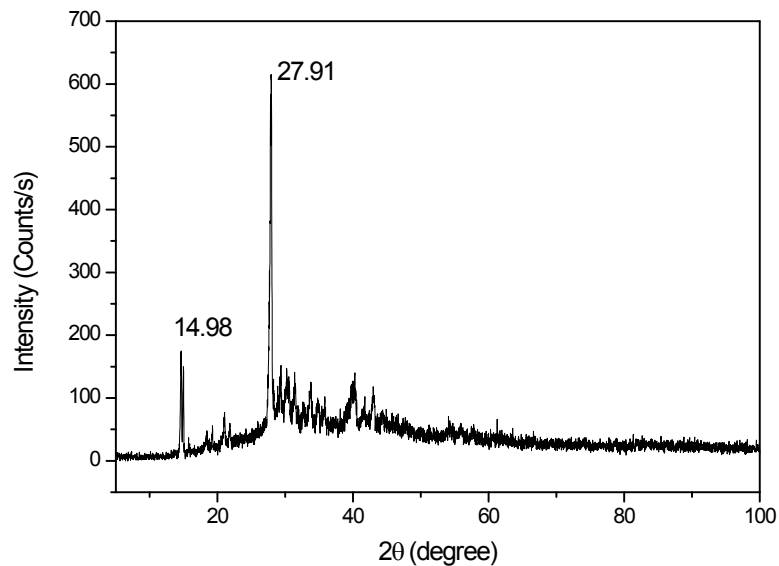

**SI- C.** XRD graph of combustion products of ionic liquid **8**

**SI- D.** Hydrophobic image of ionic liquid **10**

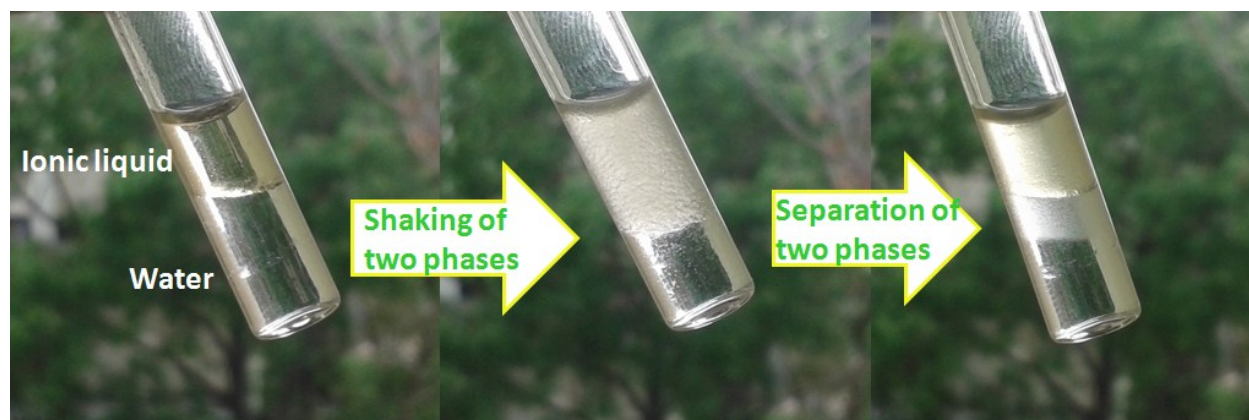

**Figure SI-D1.** Hydrophobic nature of ionic liquid **10**
